# Supplementary material
Source: Research Square preprint supplement (doi:10.21203/rs.3.rs-9781236/v1)
Supplement: Supplementary file 1 [file 397a043e09a673151d5bb9a6.xlsx]

## Sheet: Ferroptosis Genes
	Gene	L370F vs MCF7	Y537S vsMCF7	L370F vs Y537S
	FTL	-0.898892	0.28972	-1.17277
	ACSL1	-0.880543	0.278291	-1.14332
	PRNP	-1.66539	0.452637	-2.10273
	SLC39A14	-0.460701	0.585	-1.03007
	MAP1LC3B2	-1.32764	-0.232217	-1.08191
	ACSL4	-1.18731	-0.101244	-1.07056
	MAP1LC3B	-1.6775	-0.460861	-1.20146
	FTH1	-0.296227	0.143156	0
	SLC40A1	-2.01206	-1.83231	0
	SLC3A2	-1.53417	-1.89317	0
	TP53	-0.663533	-0.425723	0
	SLC7A11	-2.78762	-1.61965	-1.15578
	TF	-2.09211	-0.288718	0
	GCLC	-0.635479	0.00364599	0
	VDAC2	-0.548915	-0.140468	0
	ATG5	-0.560462	-0.185099	0
	NCOA4	-0.000608616	-0.410361	0
	ATG7	0.129	-0.362164	0
	SLC11A2	-0.244323	-0.878798	0
	CYBB	-1.491	-4.48127	0
	PCBP2	-0.447202	-0.920226	0
	SAT2	-1.39697	-6.1889	4.81024
	ALOX15	0.101517	-1.27448	1.39
	TFRC	0.463998	0.769992	0
	GCLM	0.187229	0.358597	0
	VDAC3	0.183951	0.430443	0
	ACSL5	1.42779	1.59671	0
	SLC39A8	-0.0175986	0.683267	0
	ACSL6	0	1.98458	0
	GPX4	0.0707888	0.316438	0
	LPCAT3	-0.0135735	1.13576	-1.13328
	HMOX1	-0.0950919	1.11456	-1.19298
	CP	-0.588235	3.45242	-4.02585
	STEAP3	0.375722	1.87478	-1.48361
	SAT1	0.365154	1.79955	-1.41896
	PCBP1	0.333648	0.138524	0
	ACSL3	0.258919	0.162256	0
	GSS	0.2943	0.0206403	0
	MAP1LC3A	1.74	-0.771915	0
