# Supplementary material
Source: Research Square preprint supplement (doi:10.21203/rs.3.rs-9781236/v1)
Supplement: Supplementary file 1 [file ba7d648d33012c230857182b.docx]

**Supplementary Figure Captions**

**Figure 1. Comparison of drugs effects in HEK293 and MCF-7 cells.**

Bar plot showing the sensitivity and the Emax calculated for each drug in the dose responses analysis performed both in stable HEK293 cells expressing the wild type (black), the L370F (green) and Y537S (red) ERα and in parental (black) and in CRISPR/Cas9 engineered MCF7 cells expressing the the L370F (green) and Y537S (red) ERα for both estrogen the responsive element (ERE)-based transcriptional assays (A) and the evaluation of the ERα intracellular levels measured by Western blotting analyses (B).

**Figure 2. Effect of 4-OH-tamoxifen in HEK293 and MCF-7 cells.**

(A) Western blot and (A’) relative densitometric analyses of ERα levels and estrogen the responsive element (ERE)-based transcriptional activity (B) in stable HEK293 cells expressing the wild type (WT-black), the L370F (L370F-green) and Y537S (Y537S-red) ERα treated for 24 hours with the indicated doses of 4OH-tamoxifen (Tam). Each experiment was performed at least in triplicate. (C) Western blot and (C’) relative densitometric analyses of ERα levels and estrogen the responsive element (ERE)-based transcriptional activity (E) in stable HEK293 cells expressing the wild type (WT-black), the L370F (L370F-green) and Y537S (Y537S-red) ERα together with ERE-NLuc reporter construct (NLuc) treated for 24 hours with the indicated doses of Tam. Each experiment was performed at least in triplicate. (C) Western blot and (C’) relative densitometric analyses of ERα levels in parental and CRISPR/CAS9 engineered L370F and Y537S MCF-7 cells treated for 24 hours with the indicated doses of Tam. Each experiment was performed at least in triplicate. (E) Dose-response of ERα transcriptional activity in parental and CRISPR/CAS9 engineered L370F and Y537S MCF-7 cells stably expressing the ERE-NLuc reporter construct (NLuc) treated with the indicated doses of Tam. Experiments were performed three times, and each condition was tested in triplicate. (D) Growth curve analyses in parental and CRISPR/CAS9 engineered L370F and Y537S MCF-7 cells treated with the indicated doses Tam. Experiments were performed using the xCelligence RTCA system. Dose response curves were calculated at the maximum proliferation of each cell line. The compound effect is the difference between the normalized cell index (NCI) value in the treated samples and the NCI value in the untreated samples at the time point when cells reach the maximal growth (i.e., confluency).

**Figure 3. Effect of lasofoxifene in HEK293 and MCF-7 cells.**

(A) Western blot and (A’) relative densitometric analyses of ERα levels and estrogen the responsive element (ERE)-based transcriptional activity (B) in stable HEK293 cells expressing the wild type (WT-black), the L370F (L370F-green) and Y537S (Y537S-red) ERα treated for 24 hours with the indicated doses of lasofoxifene (Laso). Each experiment was performed at least in triplicate. (C) Western blot and (C’) relative densitometric analyses of ERα levels and estrogen the responsive element (ERE)-based transcriptional activity (E) in stable HEK293 cells expressing the wild type (WT-black), the L370F (L370F-green) and Y537S (Y537S-red) ERα together with ERE-NLuc reporter construct (NLuc) treated for 24 hours with the indicated doses of Laso. Each experiment was performed at least in triplicate. (C) Western blot and (C’) relative densitometric analyses of ERα levels in parental and CRISPR/CAS9 engineered L370F and Y537S MCF-7 cells treated for 24 hours with the indicated doses of Laso. Each experiment was performed at least in triplicate. (E) Dose-response of ERα transcriptional activity in parental and CRISPR/CAS9 engineered L370F and Y537S MCF-7 cells stably expressing the ERE-NLuc reporter construct (NLuc) treated with the indicated doses of Laso. Experiments were performed three times, and each condition was tested in triplicate. (D) Growth curve analyses in parental and CRISPR/CAS9 engineered L370F and Y537S MCF-7 cells treated with the indicated doses Laso. Experiments were performed using the xCelligence RTCA system. Dose response curves were calculated at the maximum proliferation of each cell line. The compound effect is the difference between the normalized cell index (NCI) value in the treated samples and the NCI value in the untreated samples at the time point when cells reach the maximal growth (i.e., confluency).

**Figure 4. Effect of raloxifene in HEK293 and MCF-7 cells.**

(A) Western blot and (A’) relative densitometric analyses of ERα levels and estrogen the responsive element (ERE)-based transcriptional activity (B) in stable HEK293 cells expressing the wild type (WT-black), the L370F (L370F-green) and Y537S (Y537S-red) ERα treated for 24 hours with the indicated doses of raloxifene (Ralo). Each experiment was performed at least in triplicate. (C) Western blot and (C’) relative densitometric analyses of ERα levels and estrogen the responsive element (ERE)-based transcriptional activity (E) in stable HEK293 cells expressing the wild type (WT-black), the L370F (L370F-green) and Y537S (Y537S-red) ERα together with ERE-NLuc reporter construct (NLuc) treated for 24 hours with the indicated doses of Ralo. Each experiment was performed at least in triplicate. (C) Western blot and (C’) relative densitometric analyses of ERα levels in parental and CRISPR/CAS9 engineered L370F and Y537S MCF-7 cells treated for 24 hours with the indicated doses of Ralo. Each experiment was performed at least in triplicate. (E) Dose-response of ERα transcriptional activity in parental and CRISPR/CAS9 engineered L370F and Y537S MCF-7 cells stably expressing the ERE-NLuc reporter construct (NLuc) treated with the indicated doses of Ralo. Experiments were performed three times, and each condition was tested in triplicate. (D) Growth curve analyses in parental and CRISPR/CAS9 engineered L370F and Y537S MCF-7 cells treated with the indicated doses Ralo. Experiments were performed using the xCelligence RTCA system. Dose response curves were calculated at the maximum proliferation of each cell line. The compound effect is the difference between the normalized cell index (NCI) value in the treated samples and the NCI value in the untreated samples at the time point when cells reach the maximal growth (i.e., confluency).

**Figure 6. Effect of camizestrant in HEK293 and MCF-7 cells.**

(A) Western blot and (A’) relative densitometric analyses of ERα levels and estrogen the responsive element (ERE)-based transcriptional activity (B) in stable HEK293 cells expressing the wild type (WT-black), the L370F (L370F-green) and Y537S (Y537S-red) ERα treated for 24 hours with the indicated doses of camizestrant (Cami). Each experiment was performed at least in triplicate. (C) Western blot and (C’) relative densitometric analyses of ERα levels and estrogen the responsive element (ERE)-based transcriptional activity (E) in stable HEK293 cells expressing the wild type (WT-black), the L370F (L370F-green) and Y537S (Y537S-red) ERα together with ERE-NLuc reporter construct (NLuc) treated for 24 hours with the indicated doses of Cami. Each experiment was performed at least in triplicate. (C) Western blot and (C’) relative densitometric analyses of ERα levels in parental and CRISPR/CAS9 engineered L370F and Y537S MCF-7 cells treated for 24 hours with the indicated doses of Cami. Each experiment was performed at least in triplicate. (E) Dose-response of ERα transcriptional activity in parental and CRISPR/CAS9 engineered L370F and Y537S MCF-7 cells stably expressing the ERE-NLuc reporter construct (NLuc) treated with the indicated doses of Cami. Experiments were performed three times, and each condition was tested in triplicate. (D) Growth curve analyses in parental and CRISPR/CAS9 engineered L370F and Y537S MCF-7 cells treated with the indicated doses Cami. Experiments were performed using the xCelligence RTCA system. Dose response curves were calculated at the maximum proliferation of each cell line. The compound effect is the difference between the normalized cell index (NCI) value in the treated samples and the NCI value in the untreated samples at the time point when cells reach the maximal growth (i.e., confluency).

**Figure 7. Effect of giredestrant in HEK293 and MCF-7 cells.**

(A) Western blot and (A’) relative densitometric analyses of ERα levels and estrogen the responsive element (ERE)-based transcriptional activity (B) in stable HEK293 cells expressing the wild type (WT-black), the L370F (L370F-green) and Y537S (Y537S-red) ERα treated for 24 hours with the indicated doses of giredestrant (Gire). Each experiment was performed at least in triplicate. (C) Western blot and (C’) relative densitometric analyses of ERα levels and estrogen the responsive element (ERE)-based transcriptional activity (E) in stable HEK293 cells expressing the wild type (WT-black), the L370F (L370F-green) and Y537S (Y537S-red) ERα together with ERE-NLuc reporter construct (NLuc) treated for 24 hours with the indicated doses of Gire. Each experiment was performed at least in triplicate. (C) Western blot and (C’) relative densitometric analyses of ERα levels in parental and CRISPR/CAS9 engineered L370F and Y537S MCF-7 cells treated for 24 hours with the indicated doses of Gire. Each experiment was performed at least in triplicate. (E) Dose-response of ERα transcriptional activity in parental and CRISPR/CAS9 engineered L370F and Y537S MCF-7 cells stably expressing the ERE-NLuc reporter construct (NLuc) treated with the indicated doses of Gire. Experiments were performed three times, and each condition was tested in triplicate. (D) Growth curve analyses in parental and CRISPR/CAS9 engineered L370F and Y537S MCF-7 cells treated with the indicated doses Gire. Experiments were performed using the xCelligence RTCA system. Dose response curves were calculated at the maximum proliferation of each cell line. The compound effect is the difference between the normalized cell index (NCI) value in the treated samples and the NCI value in the untreated samples at the time point when cells reach the maximal growth (i.e., confluency).

**Figure 8. Effect of GDC-0927 in HEK293 and MCF-7 cells.**

(A) Western blot and (A’) relative densitometric analyses of ERα levels and estrogen the responsive element (ERE)-based transcriptional activity (B) in stable HEK293 cells expressing the wild type (WT-black), the L370F (L370F-green) and Y537S (Y537S-red) ERα treated for 24 hours with the indicated doses of GDC-0927 (GDC). Each experiment was performed at least in triplicate. (C) Western blot and (C’) relative densitometric analyses of ERα levels and estrogen the responsive element (ERE)-based transcriptional activity (E) in stable HEK293 cells expressing the wild type (WT-black), the L370F (L370F-green) and Y537S (Y537S-red) ERα together with ERE-NLuc reporter construct (NLuc) treated for 24 hours with the indicated doses of GDC. Each experiment was performed at least in triplicate. (C) Western blot and (C’) relative densitometric analyses of ERα levels in parental and CRISPR/CAS9 engineered L370F and Y537S MCF-7 cells treated for 24 hours with the indicated doses of GDC. Each experiment was performed at least in triplicate. (E) Dose-response of ERα transcriptional activity in parental and CRISPR/CAS9 engineered L370F and Y537S MCF-7 cells stably expressing the ERE-NLuc reporter construct (NLuc) treated with the indicated doses of GDC. Experiments were performed three times, and each condition was tested in triplicate. (D) Growth curve analyses in parental and CRISPR/CAS9 engineered L370F and Y537S MCF-7 cells treated with the indicated doses GDC. Experiments were performed using the xCelligence RTCA system. Dose response curves were calculated at the maximum proliferation of each cell line. The compound effect is the difference between the normalized cell index (NCI) value in the treated samples and the NCI value in the untreated samples at the time point when cells reach the maximal growth (i.e., confluency).

**Figure 9. Effect of imlunestrant in HEK293 and MCF-7 cells.**

(A) Western blot and (A’) relative densitometric analyses of ERα levels and estrogen the responsive element (ERE)-based transcriptional activity (B) in stable HEK293 cells expressing the wild type (WT-black), the L370F (L370F-green) and Y537S (Y537S-red) ERα treated for 24 hours with the indicated doses of imlunsetrant (Imlu). Each experiment was performed at least in triplicate. (C) Western blot and (C’) relative densitometric analyses of ERα levels and estrogen the responsive element (ERE)-based transcriptional activity (E) in stable HEK293 cells expressing the wild type (WT-black), the L370F (L370F-green) and Y537S (Y537S-red) ERα together with ERE-NLuc reporter construct (NLuc) treated for 24 hours with the indicated doses of Imlu. Each experiment was performed at least in triplicate. (C) Western blot and (C’) relative densitometric analyses of ERα levels in parental and CRISPR/CAS9 engineered L370F and Y537S MCF-7 cells treated for 24 hours with the indicated doses of Imlu. Each experiment was performed at least in triplicate. (E) Dose-response of ERα transcriptional activity in parental and CRISPR/CAS9 engineered L370F and Y537S MCF-7 cells stably expressing the ERE-NLuc reporter construct (NLuc) treated with the indicated doses of Imlu. Experiments were performed three times, and each condition was tested in triplicate. (D) Growth curve analyses in parental and CRISPR/CAS9 engineered L370F and Y537S MCF-7 cells treated with the indicated doses Imlu. Experiments were performed using the xCelligence RTCA system. Dose response curves were calculated at the maximum proliferation of each cell line. The compound effect is the difference between the normalized cell index (NCI) value in the treated samples and the NCI value in the untreated samples at the time point when cells reach the maximal growth (i.e., confluency).

**Figure 10. Effect of AZD9496 in HEK293 and MCF-7 cells.**

(A) Western blot and (A’) relative densitometric analyses of ERα levels and estrogen the responsive element (ERE)-based transcriptional activity (B) in stable HEK293 cells expressing the wild type (WT-black), the L370F (L370F-green) and Y537S (Y537S-red) ERα treated for 24 hours with the indicated doses of AZD9496. Each experiment was performed at least in triplicate. (C) Western blot and (C’) relative densitometric analyses of ERα levels and estrogen the responsive element (ERE)-based transcriptional activity (E) in stable HEK293 cells expressing the wild type (WT-black), the L370F (L370F-green) and Y537S (Y537S-red) ERα together with ERE-NLuc reporter construct (NLuc) treated for 24 hours with the indicated doses of AZD9496. Each experiment was performed at least in triplicate. (C) Western blot and (C’) relative densitometric analyses of ERα levels in parental and CRISPR/CAS9 engineered L370F and Y537S MCF-7 cells treated for 24 hours with the indicated doses of AZD9496. Each experiment was performed at least in triplicate. (E) Dose-response of ERα transcriptional activity in parental and CRISPR/CAS9 engineered L370F and Y537S MCF-7 cells stably expressing the ERE-NLuc reporter construct (NLuc) treated with the indicated doses of AZD9496. Experiments were performed three times, and each condition was tested in triplicate. (D) Growth curve analyses in parental and CRISPR/CAS9 engineered L370F and Y537S MCF-7 cells treated with the indicated doses AZD9496. Experiments were performed using the xCelligence RTCA system. Dose response curves were calculated at the maximum proliferation of each cell line. The compound effect is the difference between the normalized cell index (NCI) value in the treated samples and the NCI value in the untreated samples at the time point when cells reach the maximal growth (i.e., confluency).

**Figure 11. Effect of H3B-5942 in HEK293 and MCF-7 cells.**

(A) Western blot and (A’) relative densitometric analyses of ERα levels and estrogen the responsive element (ERE)-based transcriptional activity (B) in stable HEK293 cells expressing the wild type (WT-black), the L370F (L370F-green) and Y537S (Y537S-red) ERα treated for 24 hours with the indicated doses of H3B-5942 (H3B). Each experiment was performed at least in triplicate. (C) Western blot and (C’) relative densitometric analyses of ERα levels and estrogen the responsive element (ERE)-based transcriptional activity (E) in stable HEK293 cells expressing the wild type (WT-black), the L370F (L370F-green) and Y537S (Y537S-red) ERα together with ERE-NLuc reporter construct (NLuc) treated for 24 hours with the indicated doses of H3B. Each experiment was performed at least in triplicate. (C) Western blot and (C’) relative densitometric analyses of ERα levels in parental and CRISPR/CAS9 engineered L370F and Y537S MCF-7 cells treated for 24 hours with the indicated doses of H3B. Each experiment was performed at least in triplicate. (E) Dose-response of ERα transcriptional activity in parental and CRISPR/CAS9 engineered L370F and Y537S MCF-7 cells stably expressing the ERE-NLuc reporter construct (NLuc) treated with the indicated doses of H3B. Experiments were performed three times, and each condition was tested in triplicate. (D) Growth curve analyses in parental and CRISPR/CAS9 engineered L370F and Y537S MCF-7 cells treated with the indicated doses H3B. Experiments were performed using the xCelligence RTCA system. Dose response curves were calculated at the maximum proliferation of each cell line. The compound effect is the difference between the normalized cell index (NCI) value in the treated samples and the NCI value in the untreated samples at the time point when cells reach the maximal growth (i.e., confluency).

**Figure 12. Effect of bazedoxifene in HEK293 and MCF-7 cells.**

(A) Western blot and (A’) relative densitometric analyses of ERα levels and estrogen the responsive element (ERE)-based transcriptional activity (B) in stable HEK293 cells expressing the wild type (WT-black), the L370F (L370F-green) and Y537S (Y537S-red) ERα treated for 24 hours with the indicated doses of bazedoxifene (BZD). Each experiment was performed at least in triplicate. (C) Western blot and (C’) relative densitometric analyses of ERα levels and estrogen the responsive element (ERE)-based transcriptional activity (E) in stable HEK293 cells expressing the wild type (WT-black), the L370F (L370F-green) and Y537S (Y537S-red) ERα together with ERE-NLuc reporter construct (NLuc) treated for 24 hours with the indicated doses of BZD. Each experiment was performed at least in triplicate. (C) Western blot and (C’) relative densitometric analyses of ERα levels in parental and CRISPR/CAS9 engineered L370F and Y537S MCF-7 cells treated for 24 hours with the indicated doses of BZD. Each experiment was performed at least in triplicate. (E) Dose-response of ERα transcriptional activity in parental and CRISPR/CAS9 engineered L370F and Y537S MCF-7 cells stably expressing the ERE-NLuc reporter construct (NLuc) treated with the indicated doses of BZD. Experiments were performed three times, and each condition was tested in triplicate. (D) Growth curve analyses in parental and CRISPR/CAS9 engineered L370F and Y537S MCF-7 cells treated with the indicated doses BZD. Experiments were performed using the xCelligence RTCA system. Dose response curves were calculated at the maximum proliferation of each cell line. The compound effect is the difference between the normalized cell index (NCI) value in the treated samples and the NCI value in the untreated samples at the time point when cells reach the maximal growth (i.e., confluency).

**Figure 13. Effect of palazestrant in HEK293 and MCF-7 cells.**

(A) Western blot and (A’) relative densitometric analyses of ERα levels and estrogen the responsive element (ERE)-based transcriptional activity (B) in stable HEK293 cells expressing the wild type (WT-black), the L370F (L370F-green) and Y537S (Y537S-red) ERα treated for 24 hours with the indicated doses of palazestrant (Pala). Each experiment was performed at least in triplicate. (C) Western blot and (C’) relative densitometric analyses of ERα levels and estrogen the responsive element (ERE)-based transcriptional activity (E) in stable HEK293 cells expressing the wild type (WT-black), the L370F (L370F-green) and Y537S (Y537S-red) ERα together with ERE-NLuc reporter construct (NLuc) treated for 24 hours with the indicated doses of Pala. Each experiment was performed at least in triplicate. (C) Western blot and (C’) relative densitometric analyses of ERα levels in parental and CRISPR/CAS9 engineered L370F and Y537S MCF-7 cells treated for 24 hours with the indicated doses of Pala. Each experiment was performed at least in triplicate. (E) Dose-response of ERα transcriptional activity in parental and CRISPR/CAS9 engineered L370F and Y537S MCF-7 cells stably expressing the ERE-NLuc reporter construct (NLuc) treated with the indicated doses of Pala. Experiments were performed three times, and each condition was tested in triplicate. (D) Growth curve analyses in parental and CRISPR/CAS9 engineered L370F and Y537S MCF-7 cells treated with the indicated doses Pala. Experiments were performed using the xCelligence RTCA system. Dose response curves were calculated at the maximum proliferation of each cell line. The compound effect is the difference between the normalized cell index (NCI) value in the treated samples and the NCI value in the untreated samples at the time point when cells reach the maximal growth (i.e., confluency).

**Figure 17. Effect of CDK4/6 inhibitors MCF-7 cell proliferation.**

Growth curve analyses in parental (A, A’ and A’’) and CRISPR/CAS9 engineered L370F (B, B’ and B’’) and Y537S (C, C’ and C’’) MCF-7 cells treated with the indicated doses palbociclib (Palbo) (A, B, C), abemeciclib (Abe) (A’, B’, C’) and ribociclib (A’’, B’’, C’’). Experiments were performed using the xCelligence RTCA system measuring cell impedence every other 15 minutes. (D) Crystal violet staining of parental and CRISPR/CAS9 engineered L370F and Y537S MCF-7 cells treated with the 100nM palbociclib (Palbo), abemeciclib (Abe) and ribociclib (Ribo) for 48 hours. Significant differences were calculated using the Student’s t-test. ° (p<0.05), °° (p<0.01), °°° (p<0.001) and °°°° (p<0.0001) indicates significant differences with respect to parenta MCF-7 cells.

**Figure 15. Effect of CDK4/6 inhibitors in MCF-7 cells - 1.**

Western blot and relative densitometric analyses of ERα levels in parental and CRISPR/CAS9 engineered L370F and Y537S MCF-7 cells treated for 24 hours with the indicated doses of palbociclib (Palbo) (A, A’), abemeciclib (Abe) (B, B’) and ribociclib (C, C’). Each experiment was performed at least in triplicate.

**Figure 16. Effect of CDK4/6 inhibitors in MCF-7 cells - 2.**

Dose-response of ERα transcriptional activity in parental and CRISPR/CAS9 engineered L370F and Y537S MCF-7 cells stably expressing the ERE-NLuc reporter construct (NLuc) treated with the indicated doses of palbociclib (Palbo) (A), abemeciclib (Abe) (B) and ribociclib (C). Each experiment was performed at least in triplicate.

**Figure 17. Synergy studied among IACS-010759 and endocrine therapy drugs and CDK4/6 inhibitors in MCF-7 cells.**

Synergy maps are shown for the combinations of different doses of IACS-010759 (IACS) as well as endocrine therapy drugs and CDK4/6 inhibitors in parental and CRISPR/CAS9 engineered L370F and Y537S MCF-7 cells treated for 10, 7 and 4 days, respectively. Time points were chosen as the time required for each cell line to reach confluency. Each experiment was repeated twice.

**Figure 18. Synergy studied among RSL3 and endocrine therapy drugs and CDK4/6 inhibitors in MCF-7 cells.**

Synergy maps are shown for the combinations of different doses of RSL3 as well as endocrine therapy drugs and CDK4/6 inhibitors in parental and CRISPR/CAS9 engineered L370F and Y537S MCF-7 cells treated for 10, 7 and 4 days, respectively. Time points were chosen as the time required for each cell line to reach confluency. Each experiment was repeated twice.

**Figure 19. Synergy studied among erastin and fulvestrant, elacestrant, imlunestrant, and CDK4/6 inhibitors in MCF-7 cells.**

Synergy maps are shown for the combinations of different doses of erastin (ERA) as well as the indicated SERDs and CDK4/6 inhibitors in parental and CRISPR/CAS9 engineered L370F and Y537S MCF-7 cells treated for 10, 7 and 4 days, respectively. Time points were chosen as the time required for each cell line to reach confluency. Each experiment was repeated twice.
