# Supplementary material
Source: Research Square preprint supplement (doi:10.21203/rs.3.rs-9781236/v1)
Supplement: Supplementary file 2 [file 603af2493e5c6a34fc8afe11.xlsx]

## Sheet: IACS
	Combination	Most synergic score_lowDose
	IACSvsFul_L370F	15.7198
	IACSvsEla_L370F	12.7677
	IACSvsImlu_L370F	11.8017
	IACSvsCami_L370F	9.99599
	IACSvsGire_L370F	12.0522
	IACSvsGDC0927_L370F	10.6654
	IACSvsPala_L370F	11.6946
	IACSvsTam_L370F	13.3834
	IACSvsRal_L370F	17.9246
	IACSvsBaso_L370F	13.0805
	IACSvsLaso_L370F	14.6525
	IACSvsH3B_L370F	23.4429
	IACSvsPalbo_L370F	17.2304
	IACSvsAbe_L370F	19.6086
	IACSvsRibo_L370F	16.9268
	IACSvsFul_Y537S	25.1161
	IACSvsEla_Y537S	19.0063
	IACSvsImlu_Y537S	29.9281
	IACSvsCami_Y537S	25.9509
	IACSvsGire_Y537S	20.1396
	IACSvsGDC0927_Y537S	21.8801
	IACSvsPala_Y537S	23.6493
	IACSvsTam_Y537S	27.6808
	IACSvsRal_Y537S	23.8407
	IACSvsBaso_Y537S	23.0674
	IACSvsLaso_Y537S	23.4126
	IACSvsH3B_Y537S	32.8433
	IACSvsPalbo_Y537S	21.4077
	IACSvsAbe_Y537S	13.7874
	IACSvsRibo_Y537S	22.625
