# Supplementary material
Source: Research Square preprint supplement (doi:10.21203/rs.3.rs-9781236/v1)
Supplement: Supplementary file 3 [file 606dbc1d6eb07af3cdffbbbc.xlsx]

## Sheet: Genes Mod in L370F vs MCF7
Geni	A_LF	pAdj	-log10(pAdj)
PLA2G3	4.68737	2.06777e-09	8.6845
ABCG8	4.58581	0.0158935	1.79878
SLC1A1	4.27699	0.0418413	1.37839
PDE1A	4.0252	0.00354642	2.45021
RENBP	3.96931	0.00437582	2.35894
AQP7	3.84478	0.0346563	1.46022
ACOX2	3.83013	1.0664e-05	4.97208
PAH	3.8116	1.01737e-05	4.99252
PDE1B	3.8038	0.0412406	1.38468
AOX1	3.7645	1.21877e-52	51.9141
AMDHD1	3.38184	0.0315919	1.50042
CYP1A1	3.29818	4.97944e-47	46.3028
RHBG	3.28665	2.8319e-50	49.5479
UGT2B15	3.23075	1.37473e-30	29.8618
AKR1B10	3.21551	0.0152421	1.81695
NPC1L1	3.02382	0.00130444	2.88458
SGPP1	2.953	4.19025e-40	39.3778
CHST1	2.95069	1.34077e-09	8.87265
HS3ST3A1	2.93783	1.88058e-23	22.7257
SLC8A1	2.93409	5.02343e-24	23.299
PLTP	2.89337	3.6076e-10	9.44278
GLDC	2.809	9.85391e-08	7.00639
PLCH2	2.64007	0.000117973	3.92822
UBE2QL1	2.53898	7.78442e-49	48.1088
PYGL	2.5296	1.29336e-84	83.8883
SLC16A10	2.47812	0.00647928	2.18847
CA2	2.47139	1.14516e-303	302.941
OGDHL	2.42796	1.39828e-12	11.8544
GPX2	2.42228	1.8336e-05	4.7367
MGAT3	2.42163	0.000221817	3.65401
PNCK	2.38683	0.000319747	3.49519
CPT1C	2.38233	0.00220065	2.65745
GCK	2.34485	0.000283748	3.54707
TYMP	2.33209	2.12016e-06	5.67363
FADS2	2.26936	8.86435e-122	121.052
CRAT	2.26262	1.73193e-10	9.76147
PLA2G10	2.19703	0.0151993	1.81818
GCNT1	2.18194	5.78567e-54	53.2376
GALNT12	2.17847	0.000870576	3.06019
PDE3B	2.12412	4.00855e-29	28.397
ISYNA1	2.08471	2.623e-93	92.5812
ABCC4	2.05542	7.26328e-10	9.13887
ATP2A3	2.04826	4.47801e-267	266.349
DIO1	2.03764	1.3528e-06	5.86877
SLC6A14	2.02824	9.90583e-270	269.004
SLC39A6	2.01667	0	#NUM!
ASRGL1	2.00511	1.26881e-16	15.8966
CPS1	2.00363	1.09344e-26	25.9612
ST6GALNAC4	1.96708	4.42791e-32	31.3538
CYB5R2	1.9602	0.0324792	1.48839
RGL1	1.92268	0.00301878	2.52017
PSAT1	1.88971	2.2042e-18	17.6567
GLUD2	1.88305	3.69067e-12	11.4329
SLC25A10	1.84915	9.7867e-29	28.0094
STRA6	1.82895	0.000367018	3.43531
CKB	1.82436	2.53259e-61	60.5964
PLCH1	1.74343	5.51517e-43	42.2584
FASN	1.72205	8.12091e-210	209.09
HYAL3	1.71796	4.48481e-07	6.34826
UHRF1	1.69708	5.50951e-102	101.259
FTCD	1.69706	0.000420221	3.37652
ENTPD2	1.69181	1.08848e-15	14.9632
B3GNT4	1.68299	0.00378932	2.42144
PLA2G4F	1.67861	1.76825e-10	9.75246
RRM2	1.66357	9.6952e-122	121.013
GALNTL6	1.66114	0.000777742	3.10916
ENTPD8	1.65083	8.61488e-16	15.0648
SPHK1	1.64994	5.71429e-18	17.243
FAR2	1.64322	6.18332e-10	9.20878
SLC29A4	1.62696	7.52692e-11	10.1234
SLC16A3	1.61221	2.48681e-30	29.6044
DGAT2	1.61006	1.03115e-15	14.9867
B4GALNT1	1.59138	2.19595e-26	25.6584
SH3RF2	1.58951	0.000104297	3.98173
GALM	1.58864	5.87709e-18	17.2308
TK1	1.57676	9.45545e-117	116.024
B3GALT6	1.5426	9.7617e-39	38.0105
PADI3	1.53267	0.0077833	2.10884
CTSV	1.52797	2.82254e-22	21.5494
UGDH	1.52456	1.18937e-228	227.925
ACHE	1.52299	4.23781e-08	7.37286
ANGPTL4	1.52112	0.0281062	1.5512
GAMT	1.50936	1.67005e-14	13.7773
SLC35C1	1.48288	1.40301e-58	57.8529
KCNJ11	1.48108	7.47027e-10	9.12666
SLC9A4	1.47401	0.027667	1.55804
HPSE	1.47122	2.62683e-05	4.58057
PDE4A	1.444	0.0111548	1.95254
TCIRG1	1.44351	1.33377e-48	47.8749
ANPEP	1.44303	0.00353253	2.45191
SORD	1.43476	2.49561e-49	48.6028
SLC4A10	1.4277	2.11148e-08	7.67541
ZDHHC14	1.40573	3.07678e-06	5.5119
GALE	1.40015	2.83878e-28	27.5469
PDZD4	1.39812	1.67314e-31	30.7765
AGMAT	1.38926	4.16466e-09	8.38042
ADCY7	1.38672	0.0380216	1.41997
TXNRD1	1.37834	1.10068e-121	120.958
GPAT3	1.3663	9.90599e-09	8.0041
CKMT1B	1.36206	0.000817587	3.08747
NPAS2	1.35893	0.000465194	3.33237
PIP5K1B	1.35283	8.48028e-06	5.07159
GALNT18	1.35113	7.35421e-05	4.13346
ITPKA	1.34722	0.00272873	2.56404
TM7SF2	1.34238	1.00167e-55	54.9993
ARSA	1.34091	2.6611e-17	16.5749
DEGS1	1.329	8.94655e-34	33.0483
NMNAT2	1.32269	0.000272837	3.5641
SDC1	1.31521	7.09298e-81	80.1492
GRK3	1.30781	3.44693e-06	5.46257
GALC	1.29906	3.30661e-30	29.4806
ST8SIA4	1.29617	4.56303e-41	40.3407
STS	1.29052	1.99804e-05	4.6994
PADI2	1.28966	1.29401e-06	5.88806
HSD3B7	1.27499	6.79322e-15	14.1679
USP2	1.27155	0.000267307	3.57299
LPCAT4	1.26917	3.65786e-24	23.4368
PRKACB	1.26133	2.23048e-12	11.6516
SLC25A19	1.24568	1.76382e-11	10.7535
ATP1B1	1.23998	1.22383e-48	47.9123
FADS1	1.23524	3.52583e-93	92.4527
CHST14	1.22985	3.53119e-16	15.4521
CTSC	1.22721	2.38098e-18	17.6232
PLPPR3	1.22271	0.0147838	1.83021
FUT4	1.21824	3.89977e-06	5.40896
TICRR	1.20087	1.39766e-41	40.8546
ST6GALNAC2	1.19081	3.13769e-14	13.5034
ACAT2	1.18252	1.82543e-28	27.7386
CTH	1.17857	0.00188768	2.72407
PARP1	1.17114	9.50635e-90	89.022
PGGHG	1.16971	2.51388e-13	12.5997
NAT8L	1.16784	2.19635e-11	10.6583
SLC19A1	1.16164	4.90227e-31	30.3096
SLC27A3	1.14373	3.81989e-31	30.4179
DCXR	1.13875	3.35312e-52	51.4746
PLPP1	1.13514	0.00532115	2.27399
KHK	1.12681	9.59279e-08	7.01806
TH	1.12612	0.000533024	3.27325
AKR1C2	1.12451	3.67412e-15	14.4348
DNMT3B	1.12436	6.5327e-23	22.1849
FECH	1.12272	9.14742e-48	47.0387
ENO1	1.12173	6.00003e-138	137.222
NTAN1	1.11885	7.18575e-15	14.1435
RNF144A	1.11549	0.0236587	1.62601
PLOD3	1.11533	2.25088e-67	66.6476
PDE9A	1.1148	1.8266e-06	5.73836
NUP50	1.11341	8.30952e-57	56.0804
MAN1A1	1.10825	2.04585e-24	23.6891
CHST7	1.093	0.0204165	1.69002
CYP46A1	1.09269	0.0236759	1.62569
HAGHL	1.08367	9.78078e-29	28.0096
AKR1C3	1.07013	8.63292e-05	4.06384
GAD1	1.06465	0.00404335	2.39326
AQP3	1.06394	2.91658e-20	19.5351
HS6ST1	1.06358	1.67038e-54	53.7772
ATP8B1	1.05192	7.12465e-57	56.1472
ACLY	1.05072	3.23404e-89	88.4903
SLC16A13	1.05008	2.51838e-06	5.59888
GMPPB	1.04851	4.18305e-19	18.3785
ALDH1A3	1.03461	0.0245891	1.60926
SLC25A13	1.0236	2.171e-38	37.6633
SLC29A1	1.01823	8.52975e-29	28.0691
QPRT	1.01448	1.81556e-48	47.741
DOLK	1.00895	5.70464e-20	19.2438
CANT1	1.00092	2.13115e-49	48.6714
DAGLB	1.00012	6.51877e-16	15.1858
MTHFD1L	-1.00105	1.63162e-29	28.7874
BTD	-1.0082	2.48783e-16	15.6042
TMEM91	-1.01859	0.00100362	2.99843
CAT	-1.02113	4.93624e-33	32.3066
ADPRM	-1.02169	0.00852531	2.06929
SLC22A4	-1.02259	0.0149644	1.82494
BMP1	-1.02685	2.20247e-13	12.6571
SLC25A6	-1.027	5.03704e-51	50.2978
NAE1	-1.02967	1.38188e-31	30.8595
ELOVL2	-1.03684	2.3716e-46	45.625
PGM3	-1.04187	4.43582e-27	26.353
CES2	-1.04938	6.58642e-21	20.1814
TBL1X	-1.06089	8.75995e-71	70.0575
NT5DC3	-1.06795	3.21095e-19	18.4934
PLPP3	-1.08115	3.54514e-10	9.45037
UST	-1.09834	1.99186e-16	15.7007
BDH2	-1.11841	0.00197653	2.7041
SFXN3	-1.12503	4.00831e-23	22.397
CHST11	-1.15019	2.36106e-06	5.62689
PPA1	-1.15703	8.24063e-75	74.084
INPP4B	-1.15899	4.59987e-66	65.3373
MTHFD2L	-1.15985	9.22295e-08	7.03513
RNF125	-1.16617	0.00467747	2.32999
SC5D	-1.18383	3.41341e-29	28.4668
ACSL4	-1.18731	0.00817968	2.08726
RNF144B	-1.18772	1.55453e-09	8.8084
ALDH5A1	-1.19522	3.40815e-51	50.4675
SLC6A9	-1.19924	7.45992e-33	32.1273
CROT	-1.20016	1.40429e-44	43.8525
HSD17B14	-1.2035	0.0336066	1.47357
ABCG1	-1.2055	5.54575e-15	14.256
OAT	-1.20831	1.24587e-55	54.9045
HACD1	-1.20904	1.59166e-11	10.7982
ACSS1	-1.21004	1.44486e-28	27.8402
SLC38A2	-1.21353	1.82749e-135	134.738
SHMT2	-1.23584	1.03691e-90	89.9843
ACADM	-1.24845	3.10511e-28	27.5079
HMGCLL1	-1.25084	3.44693e-06	5.46257
ELOVL5	-1.2614	5.57519e-106	105.254
NEDD4L	-1.27541	1.56041e-57	56.8068
DIO2	-1.2922	0.000840994	3.07521
PHKB	-1.30044	2.81048e-54	53.5512
CYP24A1	-1.30377	6.28457e-05	4.20172
RORA	-1.33319	0.00794444	2.09994
EEF1A1	-1.3332	4.31099e-192	191.365
STARD13	-1.34527	1.83308e-30	29.7368
ELOVL4	-1.3546	0.00174234	2.75887
POLN	-1.38551	0.00883327	2.05388
SAT2	-1.39697	2.3032e-15	14.6377
INPP5K	-1.40381	1.19372e-44	43.9231
NMNAT3	-1.40508	3.64642e-07	6.43813
MTHFD2	-1.40667	1.94144e-160	159.712
SLC12A4	-1.41617	4.82556e-20	19.3165
PLA2G4C	-1.41653	0.0113105	1.94652
SMOX	-1.42188	6.22748e-13	12.2057
ATP8A1	-1.42293	4.4965e-18	17.3471
EGFL8	-1.44452	0.00918903	2.03673
ACMSD	-1.45784	0.0285252	1.54477
ABCC3	-1.46221	8.07399e-33	32.0929
SCARF2	-1.49053	0.00279561	2.55352
HNMT	-1.50766	8.53022e-10	9.06904
SMPD3	-1.52089	6.67228e-05	4.17573
FNTA	-1.53287	3.21703e-35	34.4925
SLC3A2	-1.53417	3.26295e-193	192.486
CYP4B1	-1.54851	0.000127809	3.89344
INPP5F	-1.56134	4.73952e-76	75.3243
MOCS2	-1.5731	3.2366e-115	114.49
CYLD	-1.57702	1.3526e-32	31.8688
TRDMT1	-1.59169	7.38656e-07	6.13156
TK2	-1.62288	1.5005e-10	9.82376
GPLD1	-1.64113	0.000278191	3.55566
ENTPD1	-1.66342	6.31254e-21	20.1998
SLC7A5	-1.67191	5.97688e-265	264.224
DHRS2	-1.67355	1.82006e-67	66.7399
ADHFE1	-1.70487	0.000893986	3.04867
TIGAR	-1.71793	0.000363533	3.43946
ABCC2	-1.72346	7.74581e-17	16.1109
SLC16A4	-1.7292	8.0107e-05	4.09633
SGPP2	-1.74519	6.80835e-15	14.167
SLC1A4	-1.7967	1.27909e-27	26.8931
CTSF	-1.83363	7.88836e-45	44.103
ATP6V1G2	-1.87404	0.0029601	2.52869
FABP5	-1.87757	1.94325e-05	4.71147
LOXL2	-1.9202	7.23929e-29	28.1403
ALDH3B2	-1.9367	3.66771e-75	74.4356
MAOA	-1.94165	5.36886e-10	9.27012
QPCT	-1.94492	0.000358391	3.44564
AK4	-1.97133	6.74616e-81	80.1709
CYP2E1	-1.98077	0.00320606	2.49403
ASNS	-2.0147	3.13865e-10	9.50326
PDE6A	-2.10223	0.00946058	2.02408
SLC43A1	-2.12234	2.34433e-10	9.62998
B3GALT5	-2.12895	4.04387e-22	21.3932
GSTM2	-2.17746	0.000132393	3.87814
FKBP7	-2.19393	0.00299068	2.52423
SPTLC3	-2.21268	0.029181	1.5349
PRKD1	-2.34347	7.80444e-11	10.1077
NPL	-2.39439	5.52295e-07	6.25783
AMFR	-2.4125	0	#NUM!
DMGDH	-2.59218	0.000131574	3.88083
GPT2	-2.71269	7.77801e-222	221.109
ZDHHC22	-2.71818	1.30417e-13	12.8847
ALDH2	-2.74831	0.00180952	2.74244
CYP2A6	-2.75244	0.00379188	2.42114
SLC7A11	-2.78762	1.13278e-94	93.9459
GGT5	-2.88521	4.40072e-05	4.35648
NOS3	-2.92091	8.43979e-05	4.07367
SLC16A1	-2.95466	7.22449e-224	223.141
RDH12	-2.97932	0.0276838	1.55777
CD36	-3.26151	0.000688195	3.16229
STAMBPL1	-3.30547	2.84486e-07	6.54594
TYRP1	-3.45012	0.0272888	1.56401
PGM1	-3.6214	8.22646e-41	40.0848
CYP4F22	-3.6284	1.90946e-13	12.7191
XYLT1	-3.64937	2.74796e-59	58.561
PHGDH	-3.65097	0	#NUM!
HGD	-3.68718	1.30409e-07	6.88469
LRP2	-3.84099	1.67001e-25	24.7773
ASS1	-4.04936	0	#NUM!
PIK3C2G	-4.24301	0.00194936	2.71011
CLPS	-4.25994	0.0420493	1.37624
ST6GALNAC5	-4.64706	0.0183375	1.73666
SLC25A27	-4.72102	0.0116664	1.93306
ALDH1L2	-5.22286	7.90453e-51	50.1021
MAOB	-5.34457	6.75234e-115	114.171
RBP1	-5.38024	2.07292e-42	41.6834
B4GALNT3	-5.45615	5.68618e-11	10.2452
SLC5A8	-5.51417	0.000131561	3.88087
CTSZ	-5.55246	9.58299e-81	80.0185
BCAT1	-5.56108	9.50949e-20	19.0218
NDST4	-5.6677	0.000296773	3.52757
SLC2A14	-5.95283	3.00484e-07	6.52218
KCNJ8	-6.31709	2.57245e-30	29.5897
PGLYRP2	-6.56583	9.62426e-07	6.01663
CYP2C8	-6.91098	5.23788e-07	6.28084
GUCY1A2	-7.21372	1.08894e-07	6.963
PDE4B	-8.08396	3.85137e-10	9.41438

## Sheet: Genes Mod in Y537S vs MCF7
Geni	B_YS	pAdj	-log10(pAdj)
SLC1A1	7.88627	1.61163e-09	8.79273
UGT1A6	6.30999	1.60785e-11	10.7938
AKR1B10	5.85551	6.16044e-10	9.21039
MID1	5.84277	5.24671e-36	35.2801
DIO2	5.64731	0	#NUM!
CA9	5.54071	3.96982e-06	5.40123
PLA2G2F	5.50052	0.000783693	3.10585
ALDH1A3	5.30278	1.31891e-107	106.88
HS3ST1	5.14748	0.000702982	3.15306
HPGD	4.88044	1.9409e-06	5.712
ALDH3A1	4.79655	0.0111952	1.95097
DIO3	4.71636	5.26858e-09	8.27831
ANGPTL4	4.63516	5.02329e-30	29.299
HAS1	4.5388	0.00698142	2.15606
NPAS2	4.49323	2.65666e-78	77.5757
SLC26A8	4.45093	0.0337119	1.47222
SGPP1	4.32305	1.63621e-101	100.786
UGT1A7	4.1911	0.0167373	1.77632
PYGL	4.17125	4.57043e-268	267.34
PIK3R5	4.14989	0.000201826	3.69502
ABCC4	4.0781	1.99062e-56	55.701
GPAT2	3.98015	0.00661117	2.17972
SLC29A4	3.93262	7.34044e-83	82.1343
RNF128	3.82802	0.0460824	1.33646
GUCY1B1	3.82479	0.00943027	2.02548
SLC16A10	3.80775	2.67505e-07	6.57267
GALNT12	3.74756	1.40824e-13	12.8513
UGT1A1	3.67117	2.76233e-07	6.55872
EGFR	3.59346	1.82659e-72	71.7384
ATP1A3	3.55971	0.00458547	2.33862
FABP5	3.549	6.23006e-83	82.2055
CSGALNACT1	3.51173	2.30062e-29	28.6382
ADCY7	3.50756	5.99439e-15	14.2223
AKR1B15	3.47909	3.57354e-09	8.4469
CP	3.45242	5.39188e-18	17.2683
AANAT	3.43873	0.00131304	2.88172
DHRS3	3.43512	3.66704e-104	103.436
GALNT14	3.37517	1.91532e-58	57.7178
AMDHD1	3.30055	0.0428459	1.36809
OGDHL	3.04459	3.18405e-20	19.497
DNM3	3.04002	3.03121e-11	10.5184
ADA	3.00501	2.17996e-40	39.6616
PNPLA3	2.97319	2.10887e-07	6.67595
GALNT18	2.9711	2.35865e-29	28.6273
PFKFB3	2.96826	6.90506e-266	265.161
SLC14A1	2.95167	1.27193e-07	6.89554
GCNT1	2.90639	3.71579e-90	89.4299
PDE9A	2.89999	7.00826e-58	57.1544
AQP3	2.89408	4.26987e-170	169.37
CYP1A1	2.78499	1.13746e-26	25.9441
AGPAT4	2.75045	0.0293921	1.53177
SPHK1	2.65323	5.5275e-49	48.2575
ACP7	2.61537	0.0049375	2.30649
SDC1	2.61422	2.69445e-166	165.57
HS3ST5	2.59473	0.00318318	2.49714
SLC15A3	2.56789	0.0167731	1.77539
GRK3	2.56769	6.55816e-28	27.1832
SERPINA3	2.49862	2.05005e-05	4.68824
FOSL1	2.46138	5.27159e-09	8.27806
AOX1	2.45381	1.60931e-13	12.7934
NMNAT2	2.41472	3.30182e-15	14.4812
ASPH	2.39513	1.17527e-164	163.93
PADI3	2.39347	1.39149e-06	5.85652
FTCD	2.34897	4.1601e-07	6.3809
ST3GAL5	2.33299	8.58914e-38	37.0661
MAN1A1	2.32089	1.46744e-94	93.8334
PDZD4	2.30697	3.95025e-76	75.4034
STRA6	2.29573	1.8608e-06	5.7303
PDE4A	2.28798	2.51944e-06	5.5987
B3GNT4	2.27911	2.29489e-05	4.63924
GLDC	2.26773	0.000237505	3.62433
FABP6	2.24138	8.35827e-05	4.07788
ASRGL1	2.23951	1.62356e-18	17.7895
ME2	2.20649	5.61553e-46	45.2506
ABCC3	2.10993	7.84352e-92	91.1055
LBR	2.09767	1.53179e-92	91.8148
GPX2	2.0954	0.00114373	2.94168
PDIA5	2.08435	2.76366e-92	91.5585
UHRF1	2.06739	6.78188e-120	119.169
LOXL2	2.05776	2.04465e-66	65.6894
CERS1	2.05207	5.90484e-07	6.22879
CTSD	2.04545	1.61217e-76	75.7926
HPSE	2.04178	6.47417e-10	9.18882
SH3BP1	2.04072	5.68746e-09	8.24508
ST3GAL1	2.01275	3.02806e-108	107.519
RHBG	1.97339	3.69224e-11	10.4327
TGM2	1.95111	4.71145e-07	6.32685
TXNRD1	1.94657	1.11776e-155	154.952
ABCA4	1.92949	1.82729e-08	7.73819
CYP1B1	1.92706	2.37481e-133	132.624
DHRS2	1.91457	1.87364e-146	145.727
SDR16C5	1.91161	0.0358017	1.4461
SLC19A1	1.90249	3.45213e-57	56.4619
ALOXE3	1.90113	8.6763e-07	6.06167
SGMS2	1.89334	6.67703e-13	12.1754
TPST1	1.89035	1.45274e-27	26.8378
SLC28A1	1.85948	0.0103808	1.98377
HSD11B1L	1.85496	0.00228908	2.64034
CYP24A1	1.84121	2.85705e-21	20.5441
GSTM4	1.83884	4.85758e-60	59.3136
GAL3ST4	1.8322	0.0306327	1.51381
GSTM5	1.82899	0.0319269	1.49584
FAH	1.81833	3.66032e-30	29.4365
ACOT11	1.81791	5.83657e-06	5.23384
SAT1	1.79955	3.64645e-59	58.4381
NAT8L	1.79007	6.24561e-22	21.2044
MDH1B	1.77619	0.00123492	2.90836
ALOX5	1.77374	0.0451178	1.34565
KCNJ11	1.76237	6.70402e-12	11.1737
ALDH1B1	1.71632	2.22462e-49	48.6527
DGAT2	1.71385	1.04733e-13	12.9799
GALE	1.71309	1.23293e-35	34.9091
PLCD3	1.69256	2.26117e-47	46.6457
ARG2	1.67968	1.44512e-05	4.8401
TPST2	1.66984	9.4104e-20	19.0264
CHST11	1.66191	2.52524e-29	28.5977
KHK	1.65608	5.39643e-14	13.2679
PRKACB	1.62697	4.52906e-18	17.344
PADI2	1.61447	2.5051e-09	8.60118
SLC29A3	1.59581	1.13931e-23	22.9434
PLCH1	1.59565	3.14458e-28	27.5024
CLCF1	1.59428	1.20866e-16	15.9177
PXYLP1	1.59079	7.41701e-20	19.1298
RNF144A	1.58663	0.000425066	3.37154
SLC25A18	1.58016	0.00163516	2.78644
PARP8	1.57785	3.83586e-11	10.4161
GFPT2	1.57095	6.15547e-11	10.2107
PLOD2	1.56732	2.02389e-67	66.6938
PLPP1	1.56553	8.87076e-05	4.05204
SLC35C1	1.5629	8.34525e-42	41.0786
CYP2U1	1.56242	1.50551e-08	7.82232
PEPD	1.55619	2.21977e-35	34.6537
PMM2	1.55357	1.08547e-44	43.9644
PARP1	1.51837	2.66334e-93	92.5746
ITPKA	1.51799	0.00170633	2.76794
SORD	1.51047	2.20541e-41	40.6565
PDXK	1.50922	2.71766e-96	95.5658
LDHA	1.50499	4.86267e-103	102.313
P4HA2	1.5021	1.38048e-31	30.86
COLGALT1	1.50076	3.94066e-47	46.4044
CTSC	1.48784	3.26566e-24	23.486
PORCN	1.48739	6.22194e-09	8.20607
PDK1	1.48728	3.97959e-28	27.4002
HAS3	1.48093	0.000433953	3.36256
PXDN	1.48043	2.5342e-66	65.5962
SLC25A10	1.46798	2.61639e-13	12.5823
LGMN	1.45497	1.96199e-43	42.7073
SLC52A3	1.4463	0.00210282	2.6772
AKR1C1	1.44189	2.44764e-05	4.61125
SLC52A2	1.43938	7.55127e-28	27.122
GALK1	1.43688	1.37521e-27	26.8616
MBOAT2	1.4346	3.20326e-37	36.4944
DCTPP1	1.43261	2.21622e-60	59.6544
PDK4	1.43027	1.59153e-06	5.79818
PLOD3	1.42881	6.923e-50	49.1597
B4GALNT1	1.41221	4.38834e-14	13.3577
NAMPT	1.41114	1.06137e-52	51.9741
CRAT	1.41007	0.00216942	2.66366
PLIN2	1.38997	2.91141e-12	11.5359
PGGHG	1.38976	2.0381e-13	12.6908
DBI	1.3864	3.78741e-77	76.4217
CHST7	1.37677	0.00233755	2.63124
HYKK	1.37581	2.31491e-09	8.63547
HPRT1	1.37281	7.77252e-43	42.1094
ACAT2	1.35908	4.40896e-32	31.3557
HSD17B11	1.35354	2.06864e-05	4.68431
ACOX1	1.34814	1.74002e-48	47.7594
HMGCS1	1.34076	5.24156e-41	40.2805
USP7	1.33896	3.63528e-71	70.4395
NT5C2	1.33809	1.39572e-41	40.8552
PNP	1.33272	4.61482e-43	42.3358
MSMO1	1.33185	3.48123e-38	37.4583
ATP1B1	1.32578	6.112e-31	30.2138
RRM2	1.32117	6.3222e-33	32.1991
PLD1	1.32076	6.828e-05	4.16571
SLC36A4	1.31751	0.000607887	3.21618
CTSV	1.31341	8.24059e-14	13.084
SOAT1	1.29498	5.82026e-21	20.2351
SQLE	1.28901	4.32122e-69	68.3644
C1GALT1	1.28546	3.04489e-11	10.5164
FDPS	1.27693	1.75392e-42	41.756
CNP	1.27504	1.40281e-28	27.853
PFKP	1.27144	1.21357e-53	52.9159
NTAN1	1.26732	1.02798e-15	14.988
SLC12A7	1.25717	9.03344e-20	19.0441
CYP26B1	1.2501	0.00144538	2.84002
ALDOC	1.24329	2.59712e-17	16.5855
ENGASE	1.24316	4.14391e-11	10.3826
CPOX	1.22852	2.91345e-24	23.5356
RRM1	1.22851	5.94192e-47	46.2261
FLAD1	1.22338	2.70831e-23	22.5673
SLC29A1	1.21609	1.79106e-21	20.7469
TST	1.21494	1.16273e-23	22.9345
GGCT	1.21206	4.11125e-28	27.386
CBR1	1.21198	4.52396e-25	24.3445
SLC44A3	1.2116	0.0157576	1.80251
HPS3	1.2109	8.31993e-47	46.0799
SLC2A6	1.19262	1.45779e-06	5.8363
TICRR	1.19135	2.83121e-29	28.548
ABCG2	1.18926	5.20014e-20	19.284
PDXP	1.18843	0.0230589	1.63716
FKBP11	1.1871	6.77031e-16	15.1694
GAD1	1.1841	0.00303098	2.51842
TK1	1.18303	7.1908e-29	28.1432
SCLY	1.1781	0.000113371	3.9455
EEF1A2	1.16977	1.06195e-37	36.9739
B4GALNT4	1.16125	9.37981e-25	24.0278
SLC41A1	1.15557	2.92771e-29	28.5335
MGAT5	1.15128	9.29961e-41	40.0315
SMPD3	1.14495	1.76434e-05	4.75342
LPCAT3	1.13576	3.4374e-10	9.46377
NAA50	1.13363	9.67899e-52	51.0142
ABCC1	1.13267	8.25994e-33	32.083
ENTPD2	1.12693	1.50039e-05	4.8238
ACP6	1.11516	4.29524e-27	26.367
HMOX1	1.11456	0.000128708	3.89039
SLCO3A1	1.11127	1.15887e-13	12.936
GALNT7	1.10297	1.4908e-20	19.8266
PPIB	1.09752	8.3432e-37	36.0787
PIGZ	1.0956	8.74893e-06	5.05805
NDUFA11	1.09549	7.8353e-09	8.10594
ALDOA	1.09447	1.32123e-10	9.87902
PEX11A	1.09437	2.1105e-22	21.6756
CBR3	1.09259	0.00268231	2.57149
AKR1C3	1.08868	0.000184585	3.7338
DPYSL2	1.08724	2.4575e-12	11.6095
EBP	1.08514	1.52831e-26	25.8158
PDE8A	1.08446	2.68841e-29	28.5705
STS	1.08193	0.00204058	2.69025
UBE2L6	1.0815	1.02063e-09	8.99113
B3GNT2	1.08079	2.42548e-17	16.6152
B4GALT1	1.07744	1.3596e-40	39.8666
ACOT9	1.07363	2.1633e-16	15.6649
GCSH	1.07237	0.00533501	2.27287
PPIF	1.07036	2.78306e-31	30.5555
B4GALT4	1.07018	7.40918e-27	26.1302
POLR3H	1.0649	3.21345e-13	12.493
CINP	1.05555	3.85252e-20	19.4143
PDIA4	1.05466	9.30314e-56	55.0314
SLC41A2	1.04624	3.77615e-06	5.42295
PLIN1	1.03538	0.0423057	1.3736
RPIA	1.03458	1.58062e-22	21.8012
NDUFAB1	1.03313	1.99586e-26	25.6999
HIF1A	1.02927	1.85887e-28	27.7308
AGMAT	1.02907	0.000241896	3.61637
NAAA	1.02596	1.69464e-15	14.7709
TBL1XR1	1.02421	2.33154e-17	16.6324
PIK3CD	1.02354	0.012002	1.92074
ISYNA1	1.02261	2.7936e-12	11.5538
IMPDH1	1.01929	8.52418e-24	23.0693
SLC25A1	1.01767	2.32578e-22	21.6334
SLC27A1	1.01673	1.06868e-06	5.97115
AKR1C2	1.01559	6.012e-10	9.22098
POMT2	1.01261	3.35887e-18	17.4738
GALNT2	1.00572	2.47818e-25	24.6059
TM7SF2	1.00114	1.69627e-15	14.7705
ABCC5	-1.00471	1.0329e-34	33.9859
EZH1	-1.01136	1.37056e-14	13.8631
SLC16A8	-1.01763	0.0367961	1.4342
KMT2A	-1.03212	2.2458e-39	38.6486
NMNAT3	-1.04338	0.000889202	3.051
ACOT8	-1.05487	5.56758e-12	11.2543
GLUL	-1.06765	1.05821e-56	55.9754
TPK1	-1.07207	0.00514314	2.28877
FMO4	-1.07418	0.00583759	2.23377
NME4	-1.07963	7.59347e-25	24.1196
SULT1A1	-1.08441	3.63641e-10	9.43933
MTHFS	-1.08618	0.0192635	1.71527
MTM1	-1.09505	1.1073e-13	12.9557
B3GNTL1	-1.09639	2.10881e-06	5.67596
ITPK1	-1.09755	1.06239e-31	30.9737
NT5M	-1.09912	0.00946443	2.02391
PAFAH2	-1.09983	1.0226e-10	9.99029
PHKB	-1.10562	1.44508e-23	22.8401
SLC25A38	-1.10683	2.67247e-25	24.5731
SLC34A3	-1.11447	0.0222829	1.65203
SLC9A8	-1.11749	3.01689e-26	25.5204
SLC38A2	-1.11964	1.8413e-52	51.7349
POLK	-1.12176	9.29566e-07	6.03172
USP4	-1.12311	1.69507e-30	29.7708
ENPP1	-1.12476	3.17139e-24	23.4987
UBE2D4	-1.12501	0.000299173	3.52408
ACYP2	-1.12527	0.000119243	3.92357
TMLHE	-1.13026	2.6555e-09	8.57585
XYLB	-1.13058	1.37336e-05	4.86222
ETNK2	-1.13064	3.56579e-10	9.44784
CSAD	-1.14295	1.87329e-19	18.7274
ALAD	-1.14427	8.17693e-29	28.0874
PIGG	-1.14938	2.31097e-25	24.6362
TENT2	-1.15948	2.13879e-25	24.6698
POLR2A	-1.17114	4.45481e-33	32.3512
KAT6B	-1.1823	1.52029e-25	24.8181
STARD13	-1.18276	8.90804e-20	19.0502
GK	-1.1913	0.000323701	3.48986
ATP8B2	-1.19579	1.50932e-18	17.8212
FAXDC2	-1.19798	9.30289e-05	4.03138
CYLD	-1.20154	1.14145e-16	15.9425
TNS2	-1.20774	4.97847e-06	5.3029
MAN1B1	-1.21075	4.48269e-30	29.3485
PDK2	-1.2219	6.09412e-14	13.2151
PIP4K2A	-1.24355	1.92131e-48	47.7164
ACACB	-1.24366	5.12334e-17	16.2904
RXRA	-1.24835	1.06828e-44	43.9713
LPIN1	-1.24961	7.60384e-24	23.119
MCEE	-1.25029	2.80957e-10	9.55136
HS6ST2	-1.25052	1.3058e-06	5.88412
PLCG1	-1.25269	2.75561e-42	41.5598
FN3K	-1.2576	1.61996e-05	4.79049
SLC25A20	-1.26003	5.94711e-08	7.22569
PHGDH	-1.27294	2.43413e-62	61.6137
ALOX15	-1.27448	1.46221e-14	13.835
SLC15A2	-1.28141	7.31604e-07	6.13572
NUP214	-1.30157	3.72527e-32	31.4288
RNF152	-1.31709	2.74372e-10	9.56166
TMPPE	-1.32268	0.00113468	2.94513
ADI1	-1.32485	1.40603e-51	50.852
DGKA	-1.32611	5.64792e-12	11.2481
SLC16A9	-1.34353	1.0426e-06	5.98188
SLC2A11	-1.34878	2.05966e-16	15.6862
SDSL	-1.35484	1.71212e-14	13.7665
SLC12A5	-1.35889	2.22185e-08	7.65328
ELOVL4	-1.36221	0.00367047	2.43528
HAGH	-1.37118	1.79306e-24	23.7464
GGT1	-1.39276	0.0288579	1.53974
NUP62CL	-1.39814	0.0006547	3.18396
PCBD2	-1.43225	4.56051e-19	18.341
GPX3	-1.44232	2.03278e-21	20.6919
KYNU	-1.44374	9.6132e-60	59.0171
PPIE	-1.44521	1.16436e-32	31.9339
CARNS1	-1.44815	0.0121502	1.91542
PIK3R3	-1.45177	1.56754e-56	55.8048
LIPT2	-1.45922	0.00697353	2.15655
SLC16A1	-1.46756	1.08173e-55	54.9659
ADPRH	-1.4736	0.000159602	3.79696
DDAH1	-1.47491	2.45721e-41	40.6096
LCAT	-1.47896	2.87998e-05	4.54061
PHPT1	-1.49039	5.87452e-41	40.231
INPP5F	-1.49231	3.91168e-49	48.4076
SLC38A1	-1.50101	1.58507e-101	100.8
DNM1	-1.51187	1.504e-24	23.8228
ACOT4	-1.51955	4.51304e-07	6.34553
CYP4F11	-1.52661	1.53301e-09	8.81446
HECTD2	-1.53714	1.09452e-18	17.9608
DUOX1	-1.53941	0.00367609	2.43461
RORA	-1.56277	0.0120617	1.91859
ADCY9	-1.56578	3.53628e-41	40.4515
PPARA	-1.56775	1.40952e-13	12.8509
NOS3	-1.57432	0.0160697	1.79399
TRIM32	-1.58174	3.56499e-20	19.4479
GANC	-1.58476	5.54034e-08	7.25646
SLC16A2	-1.61196	1.58632e-20	19.7996
TK2	-1.61372	6.04818e-09	8.21838
SLC7A11	-1.61965	1.90856e-35	34.7193
MACROD2	-1.63597	1.20559e-06	5.9188
SERPINA1	-1.65118	5.47777e-06	5.2614
SLC9A2	-1.65765	1.3671e-32	31.8642
FAAH2	-1.66172	2.96908e-05	4.52738
RDH16	-1.66198	0.0399281	1.39872
SLC35D1	-1.6756	2.79793e-29	28.5532
PPP1R3C	-1.68247	5.3315e-22	21.2732
PLA2G4C	-1.68247	0.00293675	2.53213
ARSD	-1.7042	8.82452e-51	50.0543
LPIN3	-1.70915	2.58815e-57	56.587
HSD17B14	-1.71003	0.0030242	2.51939
TAF9	-1.72074	5.84469e-60	59.2332
BTD	-1.74793	1.836e-33	32.7361
TBL1X	-1.7641	1.43428e-115	114.843
KAT2B	-1.76595	1.06046e-46	45.9745
NDST2	-1.76936	0.0389657	1.40932
PTPRQ	-1.77726	0.0286589	1.54274
HS6ST3	-1.79752	1.45502e-19	18.8371
PLA2G6	-1.81005	3.20292e-21	20.4945
SGPP2	-1.81328	1.21503e-14	13.9154
SLC7A8	-1.81661	0.0019092	2.71915
CYP27B1	-1.82406	8.96707e-11	10.0473
PTGES	-1.85163	2.45001e-18	17.6108
SLC6A9	-1.85267	5.16279e-49	48.2871
MCCC2	-1.8582	3.35478e-152	151.474
TPO	-1.859	1.72239e-12	11.7639
UAP1L1	-1.86921	8.34211e-39	38.0787
ENTPD1	-1.8785	1.05155e-20	19.9782
UGCG	-1.87917	3.88583e-116	115.411
SLC3A2	-1.89317	3.95353e-156	155.403
CYP4V2	-1.963	7.75489e-13	12.1104
SLC1A4	-1.97578	8.92464e-24	23.0494
XYLT1	-1.99733	4.83419e-27	26.3157
SLC27A6	-2.00175	5.63609e-11	10.249
PLPP3	-2.00509	7.47491e-21	20.1264
SLC7A2	-2.00512	9.50127e-180	179.022
PARP3	-2.01967	2.57441e-12	11.5893
GPLD1	-2.09236	5.08248e-05	4.29392
PLIN4	-2.14022	2.86028e-07	6.54359
CA2	-2.14439	1.30085e-47	46.8858
NEURL1	-2.15329	2.8301e-06	5.5482
PIK3R1	-2.18908	4.17348e-132	131.38
SLC7A5	-2.20879	2.97892e-126	125.526
HECW2	-2.24023	5.5954e-35	34.2522
ADCY1	-2.26348	2.69854e-137	136.569
ZDHHC22	-2.27399	9.65318e-10	9.01533
PPT2	-2.29409	1.04203e-12	11.9821
ACSS3	-2.2972	3.68567e-71	70.4335
DSE	-2.30081	2.0994e-11	10.6779
AMFR	-2.31004	1.19467e-179	178.923
QPCT	-2.33394	0.000211577	3.67453
GMPR	-2.36577	8.6797e-09	8.0615
GLS2	-2.37191	0.0119375	1.92309
FBP1	-2.38386	7.57289e-189	188.121
ATP6V0A4	-2.38427	1.64212e-07	6.78459
RDH5	-2.47909	0.029979	1.52318
UST	-2.48521	3.14563e-41	40.5023
GLRX	-2.52802	4.90417e-23	22.3094
SLC24A3	-2.55319	1.70081e-51	50.7693
ADHFE1	-2.57176	3.99155e-05	4.39886
GAMT	-2.59195	1.0327e-09	8.98603
ATP8A1	-2.59804	1.55077e-30	29.8095
SCARF2	-2.61537	1.35634e-05	4.86763
SLC12A4	-2.62002	2.65268e-37	36.5763
EGFL8	-2.64833	0.00016273	3.78853
DIO1	-2.68445	0.0165569	1.78102
CYP19A1	-2.71677	1.4553e-05	4.83705
MOCS2	-2.72351	2.654e-152	151.576
SLC1A2	-2.74574	8.22999e-47	46.0846
ABCD1	-2.74883	1.72649e-61	60.7628
GNMT	-2.80154	0.0191456	1.71793
ECHDC2	-2.8083	6.24772e-99	98.2043
MAT1A	-2.84625	0.0434118	1.36239
PNPLA7	-2.86919	3.37676e-29	28.4715
TCIRG1	-2.912	1.09346e-45	44.9612
INPP5J	-2.94016	8.9118e-34	33.05
NPL	-2.95113	3.10303e-08	7.50821
ALDH3B2	-2.97301	1.62189e-91	90.79
CPS1	-3.01899	1.16447e-09	8.93387
ST6GALNAC2	-3.0497	7.98071e-17	16.098
PIK3C2G	-3.05495	0.00749469	2.12525
POLN	-3.08007	1.933e-05	4.71377
ACOT2	-3.1599	8.38252e-32	31.0766
ST8SIA4	-3.16387	3.01417e-48	47.5208
PGAP1	-3.22669	1.98947e-33	32.7013
ABCC2	-3.30069	5.28036e-29	28.2773
CYP4F22	-3.33855	3.20553e-11	10.4941
SLC4A10	-3.35376	5.85116e-08	7.23276
CD36	-3.41334	0.00132855	2.87662
SLC16A7	-3.41819	1.77652e-74	73.7504
HGD	-3.49641	1.39051e-06	5.85683
ENTPD8	-3.50104	1.59365e-10	9.79761
DEGS2	-3.50106	3.74951e-90	89.426
HSD17B8	-3.50425	9.11246e-16	15.0404
DMGDH	-3.52774	3.60555e-05	4.44303
B3GALT5	-3.54649	3.89162e-31	30.4099
NT5E	-3.63158	2.33782e-36	35.6312
ASS1	-3.74992	0	#NUM!
HMGCLL1	-3.75343	1.2266e-19	18.9113
ALDH1L2	-3.826	3.16157e-47	46.5001
AK7	-3.92032	2.53168e-79	78.5966
GALM	-3.94288	2.28542e-13	12.641
ELOVL2	-3.97982	1.38878e-236	235.857
ACOT1	-4.02415	2.51995e-05	4.59861
PTGR1	-4.02804	2.39311e-66	65.621
KCNJ8	-4.04779	2.86382e-37	36.5431
RDH12	-4.29576	0.0107823	1.96729
ACSS1	-4.32046	1.19023e-99	98.9244
BHMT	-4.33985	0.0351445	1.45414
ALDH2	-4.36834	0.000983265	3.00733
HSD17B2	-4.36902	0.0365259	1.4374
KL	-4.44629	0.0254437	1.59442
LIPG	-4.55165	0.0182896	1.7378
TUT4	-4.84228	2.7614e-17	16.5589
SLC6A20	-4.97632	0.00493489	2.30672
GGT5	-5.01979	5.20873e-05	4.28327
INPP1	-5.07469	3.89972e-05	4.40897
GUCY2C	-5.0901	0.000687328	3.16284
CTSZ	-5.22822	7.29525e-72	71.137
B4GALNT3	-5.2694	4.10784e-10	9.38639
PDE6A	-5.27234	0.000356756	3.44763
GSTM1	-5.33388	0.000264102	3.57823
ATP6V1B1	-5.33572	0.000265806	3.57544
SLC52A1	-5.36721	6.69315e-08	7.17437
MYLK4	-5.4233	0.000182538	3.73865
PDE6B	-5.43702	5.7914e-11	10.2372
SLC13A3	-5.44501	1.62464e-13	12.7892
GCNT2	-5.47458	0.000169525	3.77077
NDST4	-5.48569	0.000644585	3.19072
SLC8A1	-5.57269	0.000122713	3.91111
DPYD	-5.7427	1.59278e-12	11.7978
CYP2C8	-5.76711	4.15819e-05	4.3811
SAT2	-6.1889	1.00582e-31	30.9975
SLC5A8	-6.29433	1.40645e-05	4.85188
PGLYRP2	-6.38342	2.29272e-06	5.63965
HAAO	-6.46724	7.16993e-06	5.14449
GUCY1A2	-7.03065	3.10977e-07	6.50727
PSAT1	-7.04563	6.64291e-08	7.17764
RBP1	-7.2821	2.505e-21	20.6012
SLC2A14	-7.6214	7.20982e-09	8.14208
PDE4B	-7.90181	1.21175e-09	8.91659
PNPLA4	-8.75327	4.57558e-12	11.3396
BCAT1	-9.04482	6.07836e-13	12.2162
LRP2	-9.21951	1.93789e-13	12.7127
SDR42E1	-10.1506	1.46657e-16	15.8337
CTSF	-11.1232	1.04843e-19	18.9795
MAOB	-11.6009	2.08156e-21	20.6816

## Sheet: Genes Mod in L370F vs Y537S
Geni	C_LF YS	AdjpVal	-log10(pAdj)
CTSF	9.30392	1.03878e-13	12.9835
SDR42E1	9.28188	7.35783e-14	13.1333
PSAT1	8.9509	8.02692e-13	12.0955
PNPLA4	8.64641	9.92644e-12	11.0032
SLC8A1	8.54045	9.5697e-12	11.0191
DPYD	6.36742	6.19612e-16	15.2079
MAOB	6.26421	1.48372e-05	4.82865
MYLK4	5.96899	1.60912e-05	4.79341
GCK	5.94274	1.84588e-05	4.7338
PAH	5.91123	1.98195e-05	4.70291
PLA2G3	5.90177	3.75542e-07	6.42534
HAAO	5.90103	0.000140953	3.85092
PDE1A	5.78429	0.000151965	3.81826
SLC52A1	5.56952	5.00228e-09	8.30083
GALM	5.54623	8.21387e-33	32.0855
ATP6V0D2	5.48687	0.000570429	3.2438
PDE6B	5.41758	7.81705e-11	10.107
LRP2	5.40879	0.00083342	3.07914
GSTM1	5.21933	0.000387562	3.41166
ENTPD8	5.1697	1.23103e-29	28.9097
CPS1	5.03893	1.5399e-39	38.8125
CPA6	5.02613	0.00355938	2.44863
GCNT2	4.9147	0.00133173	2.87559
SAT2	4.81024	5.97649e-17	16.2236
SLC4A10	4.79418	1.23861e-20	19.9071
DIO1	4.73455	1.30604e-09	8.88404
INPP1	4.68421	0.000234988	3.62895
CA2	4.63089	0	#NUM!
SLC13A3	4.56104	8.40244e-09	8.07559
AGXT	4.55162	0.0223335	1.65104
ACOT1	4.55093	3.20039e-07	6.4948
ST8SIA4	4.47601	1.18151e-130	129.928
TCIRG1	4.37019	1.17173e-140	139.931
CNDP1	4.35057	0.0357999	1.44612
HSD17B8	4.2655	3.70973e-27	26.4307
ST6GALNAC2	4.2614	2.70434e-46	45.5679
ELOVL3	4.2487	0.040352	1.39413
PLTP	4.23407	3.45743e-11	10.4612
MGAT3	4.13987	1.2726e-05	4.89531
TUT4	4.12907	1.35835e-11	10.867
GAMT	4.11822	1.38588e-34	33.8583
ACOT2	4.09031	9.05848e-71	70.0429
ATP6V1B1	4.0548	0.0198059	1.70321
CYB5R2	4.02535	0.0041901	2.37778
HS3ST3A1	3.99599	7.66215e-26	25.1156
HOGA1	3.89333	0.0301445	1.52079
GUCY2C	3.87941	0.0353293	1.45187
RENBP	3.868	0.00624182	2.20469
SLC16A7	3.84447	6.88546e-112	111.162
ABCB1	3.81148	0.0363557	1.43943
GALNT9	3.66872	0.0130145	1.88557
GALNTL6	3.63096	1.84366e-07	6.73432
DEGS2	3.59717	7.08022e-113	112.15
PTGR1	3.57807	7.23817e-50	49.1404
NT5E	3.50481	3.20236e-34	33.4945
NPC1L1	3.49142	1.0932e-12	11.9613
AK7	3.47972	6.38134e-59	58.1951
SLC24A3	3.38023	1.52751e-118	117.816
PNCK	3.28952	3.66702e-05	4.43569
PGAP1	3.27678	6.91362e-37	36.1603
ABCD1	3.23709	9.65397e-106	105.015
GNMT	3.16459	0.00339444	2.46923
ACSS1	3.1268	2.74117e-42	41.5621
ELOVL2	2.95868	7.50733e-114	113.125
SLC27A6	2.94632	6.65665e-31	30.1767
GDPD2	2.90242	0.0442961	1.35363
CYP19A1	2.86155	1.83143e-06	5.73721
PLPPR3	2.85695	1.96471e-05	4.7067
ADCY1	2.83187	7.10413e-247	246.148
ECHDC2	2.78855	5.88618e-102	101.23
SLC1A2	2.78709	2.9696e-51	50.5273
GMPR	2.7792	2.95835e-14	13.529
SDS	2.73763	0.0128671	1.89052
RDH5	2.73562	0.0096428	2.0158
SLC6A14	2.71798	1.32841e-269	268.877
UGT2B15	2.71641	1.47349e-23	22.8317
SLC7A8	2.64718	1.6392e-08	7.78537
FADS2	2.63382	1.06164e-112	111.974
UBE2QL1	2.59483	6.22274e-43	42.206
SLC9A4	2.54851	0.00113733	2.94411
HMGCLL1	2.5142	1.11947e-06	5.95099
PNPLA7	2.50976	4.10572e-21	20.3866
HS6ST3	2.48882	4.08546e-51	50.3888
DNM1	2.48231	2.16313e-90	89.6649
PLA2G4F	2.44679	1.28283e-14	13.8918
SLC9A2	2.4432	1.76824e-95	94.7525
CARNS1	2.41909	1.05447e-07	6.97696
INPP5J	2.3908	4.15652e-19	18.3813
SLC39A6	2.38114	0	#NUM!
PTPRQ	2.36751	0.000611552	3.21357
GLRX	2.36619	1.18794e-21	20.9252
ACOT4	2.34092	8.25854e-21	20.0831
SULT1A2	2.30636	0.000508842	3.29342
PLCH2	2.29973	0.00065026	3.18691
PLIN4	2.28866	1.03997e-08	7.98298
HECW2	2.25989	3.08099e-40	39.5113
SLC7A2	2.25316	5.33153e-255	254.273
PARP3	2.24465	5.66957e-17	16.2464
PIP5K1B	2.21579	2.48262e-09	8.60509
STARD8	2.20613	0.00382336	2.41755
SERPINA1	2.18263	1.04538e-11	10.9807
FOLR1	2.16777	0.00546486	2.26242
SLC16A9	2.16295	2.8453e-21	20.5459
ACACB	2.15531	4.72268e-63	62.3258
TRIM32	2.14871	1.99266e-45	44.7006
LIPT2	2.14068	1.00698e-06	5.99698
PPARA	2.12687	3.04733e-31	30.5161
FBP1	2.12539	1.25417e-141	140.902
FAR2	2.11118	3.47132e-12	11.4595
UAP1L1	2.10316	8.31729e-65	64.08
MACROD2	2.09164	1.75909e-12	11.7547
PLA2G10	2.08358	0.0242292	1.61566
GLS2	2.07691	0.0428797	1.36775
SLC16A3	2.06888	2.67065e-36	35.5734
CYP4F11	2.05538	3.33288e-21	20.4772
PTGES	2.05146	2.81721e-26	25.5502
SDSL	2.03156	5.6758e-38	37.246
ACP5	2.01584	0.0228138	1.6418
FHIT	2.01278	0.00248287	2.60505
FUT4	2.00703	5.4237e-11	10.2657
ST6GALNAC4	1.99404	4.11114e-30	29.386
TH	1.98785	5.29394e-08	7.27622
KAT6B	1.94504	9.09232e-115	114.041
SLC12A5	1.94165	1.23551e-19	18.9082
ACSS3	1.93732	7.18736e-50	49.1434
GPX3	1.93091	7.57072e-47	46.1209
GALC	1.92334	3.32017e-33	32.4788
B3GNT5	1.90022	1.66973e-05	4.77735
SLC34A3	1.89646	1.09553e-06	5.96038
FN3K	1.87782	4.21216e-14	13.3755
ATP6V0A4	1.86191	0.000210414	3.67693
NEURL1	1.84462	0.000141007	3.85076
CHST1	1.83541	1.19995e-05	4.92084
NUP214	1.83367	1.23115e-64	63.9097
PPP1R3C	1.82062	8.01688e-28	27.096
SULT1A1	1.8112	5.36767e-35	34.2702
RGL1	1.79034	0.00700382	2.15467
AASS	1.75437	0.0448581	1.34816
TYMP	1.73604	0.000176746	3.75265
TPK1	1.72325	2.84208e-08	7.54636
SLC15A2	1.7091	1.34148e-13	12.8724
PIK3R1	1.69982	1.58864e-109	108.799
GANC	1.68819	8.66898e-10	9.06203
CPT1C	1.6817	0.0210545	1.67665
ATP8B2	1.67697	2.6525e-41	40.5763
PIP5KL1	1.65145	8.45959e-07	6.07265
PFKFB1	1.65041	0.0141322	1.84979
HIRIP3	1.63817	3.26731e-29	28.4858
ATP2A3	1.63522	1.73099e-70	69.7617
DUOX1	1.63276	0.00110864	2.95521
CKMT1B	1.61539	1.95438e-10	9.70899
GPHN	1.6095	5.47541e-34	33.2616
KYNU	1.60312	1.98364e-76	75.7025
RXRA	1.59692	8.56292e-88	87.0674
ABCC2	1.59452	6.05766e-05	4.2177
SLC26A1	1.58451	1.36424e-11	10.8651
TMPPE	1.58379	1.45539e-05	4.83702
ADCY9	1.58233	1.21695e-42	41.9147
ACOX2	1.57662	0.0156799	1.80466
SH3RF2	1.57092	0.000475243	3.32308
DSE	1.56854	9.74436e-05	4.01125
POLM	1.55428	1.98112e-24	23.7031
PPIE	1.54808	3.82347e-38	37.4175
UGCG	1.52689	2.3989e-79	78.62
GLUD2	1.52512	1.30665e-08	7.88384
LENG9	1.4915	3.16981e-07	6.49897
CYP27B1	1.48478	5.18151e-07	6.28554
PDE3B	1.48312	7.53764e-16	15.1228
MCCC2	1.47245	3.8829e-94	93.4108
OGDH	1.45669	1.17173e-56	55.9312
HPD	1.45308	0.045575	1.34127
NME4	1.44383	5.7868e-55	54.2376
MAN1B1	1.44103	3.21864e-47	46.4923
LDHD	1.44032	9.11525e-15	14.0402
B3GALT5	1.42922	0.00187133	2.72785
QPRT	1.42891	3.62229e-63	62.441
PIK3R3	1.4221	1.43236e-56	55.8439
ARSA	1.41836	2.69439e-15	14.5695
SLC35D1	1.41529	1.76162e-21	20.7541
PPT2	1.41295	0.000297303	3.5268
UST	1.40181	1.62809e-10	9.78832
ALOX15	1.39255	6.31426e-20	19.1997
POLR2A	1.3884	6.26481e-47	46.2031
UCK1	1.36115	3.24206e-43	42.4892
TAF9	1.35976	8.50119e-36	35.0705
DGKA	1.35564	7.71945e-14	13.1124
PHPT1	1.3515	1.99181e-37	36.7008
FAAH2	1.34755	0.00197775	2.70383
ZDHHC12	1.33861	2.42243e-36	35.6157
RHBG	1.33379	1.40329e-15	14.8529
CHST8	1.33149	0.00350233	2.45564
LPIN3	1.32653	8.27672e-33	32.0821
SLC2A13	1.32602	1.20994e-06	5.91724
AOX1	1.32366	6.61322e-13	12.1796
TNS2	1.27555	3.5419e-07	6.45076
PIGG	1.26362	4.63092e-33	32.3343
HSD3B7	1.26176	2.78006e-13	12.5559
ARSD	1.26119	6.1125e-26	25.2138
TPO	1.25732	1.94741e-05	4.71054
ADI1	1.25069	2.65654e-50	49.5757
EHMT1	1.24886	2.22398e-54	53.6529
GPD2	1.24261	6.50657e-59	58.1866
ALDH4A1	1.24203	5.03581e-18	17.2979
CERS4	1.23816	1.44803e-11	10.8392
HYAL3	1.23712	0.000278032	3.5559
EPHX1	1.22925	3.32201e-21	20.4786
EZH1	1.22785	4.72396e-22	21.3257
GLA	1.22574	6.35454e-39	38.1969
SLC12A4	1.22068	3.47256e-06	5.45935
CSAD	1.21201	1.19664e-24	23.922
PLCG1	1.20702	4.24857e-40	39.3718
HSD11B2	1.20668	0.00617152	2.20961
STARD10	1.20569	6.76682e-69	68.1696
POLK	1.2049	5.87251e-08	7.23118
MAN2B2	1.20411	2.62058e-24	23.5816
GLE1	1.19362	8.58729e-41	40.0661
ATP8A1	1.19183	7.43424e-05	4.12876
SLC38A1	1.18506	6.46895e-96	95.1892
GPAT3	1.17597	1.7656e-06	5.75311
MOCS2	1.16578	2.86622e-22	21.5427
IDUA	1.16144	8.38148e-13	12.0767
SLC16A6	1.16049	4.86093e-24	23.3133
MAN1C1	1.14944	2.66497e-05	4.57431
FMO4	1.14812	0.00331577	2.47942
GLB1L	1.1445	3.57884e-05	4.44626
DEGS1	1.12512	6.52855e-21	20.1852
XYLB	1.12381	9.43207e-06	5.02539
B3GNTL1	1.11772	2.82985e-07	6.54824
KAT2B	1.10395	9.32071e-16	15.0306
LTC4S	1.09451	0.0018199	2.73995
CREBBP	1.09178	5.8091e-41	40.2359
AMACR	1.09156	0.0480292	1.31849
YKT6	1.08893	1.08803e-34	33.9634
ISYNA1	1.07785	9.84291e-21	20.0069
PCBD2	1.07759	1.0466e-10	9.98022
HECTD2	1.07748	3.40828e-09	8.46747
SLC2A11	1.07449	2.18376e-10	9.66079
ENO3	1.07233	2.71552e-06	5.56615
PIP4K2A	1.06694	4.94493e-38	37.3058
SLC9A5	1.06592	0.00546354	2.26253
PPCS	1.06389	1.70467e-16	15.7684
GPX8	1.06319	0.000124265	3.90565
OPLAH	1.05506	1.85381e-06	5.73194
COQ6	1.05345	3.5895e-07	6.44497
SLC25A20	1.05253	5.5675e-05	4.25434
ALDH3B2	1.05238	6.38231e-08	7.19502
SLC2A8	1.05173	3.22526e-15	14.4914
KMT2D	1.04827	6.46563e-22	21.1894
B3GALT6	1.04423	1.77341e-16	15.7512
HHAT	1.03901	0.000663248	3.17832
HMGCR	1.03661	2.08387e-34	33.6811
DOLPP1	1.03461	3.54297e-18	17.4506
PIGV	1.03436	2.18602e-10	9.66035
CYP4V2	1.02818	0.00453861	2.34308
SLC25A38	1.01904	2.75965e-20	19.5591
SLC2A1	1.01623	9.51424e-26	25.0216
COASY	1.00677	1.83347e-18	17.7367
GNE	1.00246	3.59738e-06	5.44401
PTDSS1	-1.00574	2.97087e-33	32.5271
UBE2Q2	-1.01793	2.14783e-18	17.668
MPST	-1.02752	2.40825e-23	22.6183
SLC39A14	-1.03007	3.06892e-21	20.513
TPST1	-1.0365	8.20155e-11	10.0861
SH3BP1	-1.0397	0.00128415	2.89139
ASNS	-1.04751	0.0142605	1.84586
RNF144B	-1.05541	1.03193e-06	5.98635
SOAT1	-1.06027	2.19357e-15	14.6588
ACSL4	-1.07056	0.0316699	1.49935
CLCF1	-1.07421	1.83436e-09	8.73652
ITPA	-1.0744	1.20716e-17	16.9182
NMNAT2	-1.07525	1.3237e-05	4.87821
COX10	-1.07605	2.40943e-14	13.6181
RNF125	-1.08006	0.0134522	1.87121
NDUFA11	-1.08722	1.88269e-09	8.72522
GYG1	-1.0935	7.73784e-41	40.1114
PEPD	-1.10076	2.03413e-18	17.6916
SLC41A1	-1.10179	5.75705e-29	28.2398
ST3GAL1	-1.10463	9.87653e-43	42.0054
GAPDH	-1.10614	1.17727e-74	73.9291
GALNT10	-1.1121	1.56819e-35	34.8046
GSTM3	-1.11558	6.49822e-55	54.1872
EXTL2	-1.1165	8.52264e-05	4.06943
TBL1XR1	-1.11797	6.59864e-20	19.1805
ABCC8	-1.1255	4.17008e-06	5.37986
SLC17A5	-1.1326	2.65819e-09	8.57541
LPCAT3	-1.13328	3.31516e-10	9.4795
CYP4B1	-1.13352	0.0230611	1.63712
PON2	-1.1337	1.24261e-15	14.9057
ACSL1	-1.14332	1.48835e-27	26.8273
CAT	-1.15466	3.96119e-34	33.4022
SLC7A11	-1.15578	3.26867e-08	7.48563
PLCD3	-1.15744	4.48855e-27	26.3479
LBR	-1.1612	3.34462e-33	32.4757
MBOAT2	-1.17154	1.00651e-26	25.9972
PPA1	-1.18793	2.05191e-34	33.6878
HMOX1	-1.19298	1.92812e-05	4.71487
LYPLA1	-1.19452	1.36799e-30	29.8639
MAN1A1	-1.19759	4.50304e-34	33.3465
ZDHHC9	-1.20593	1.06346e-42	41.9733
SLC27A2	-1.20965	8.47214e-12	11.072
USP7	-1.21139	3.26294e-68	67.4864
PDXK	-1.21451	2.26852e-69	68.6443
UBE2D1	-1.23338	1.88267e-19	18.7252
ACOT9	-1.23965	1.01282e-21	20.9945
GRK3	-1.24245	8.8672e-12	11.0522
PARP12	-1.24481	8.15711e-15	14.0885
PLIN1	-1.24512	0.00669746	2.17409
SERPINA3	-1.24588	0.0130513	1.88435
EEF1A2	-1.25157	4.63676e-45	44.3338
SLC29A3	-1.2642	5.98108e-18	17.2232
PARP8	-1.26707	3.11646e-08	7.50634
HPRT1	-1.27896	4.70609e-39	38.3273
LDHA	-1.28189	1.81062e-80	79.7422
PMM2	-1.28206	8.49232e-35	34.071
SDC1	-1.28293	2.15889e-49	48.6658
INPP4B	-1.28564	1.11515e-59	58.9527
ACE	-1.2896	0.0137623	1.86131
P4HA1	-1.29023	1.02117e-32	31.9909
HERC4	-1.2955	2.69816e-32	31.5689
TPST2	-1.30843	5.43277e-13	12.265
AHCYL1	-1.30904	5.45319e-86	85.2633
SLC16A10	-1.30938	0.00716553	2.14475
PXYLP1	-1.32132	4.00842e-16	15.397
ALDOC	-1.32415	3.54026e-20	19.451
HPS3	-1.34462	8.88496e-62	61.0513
CRLS1	-1.3449	4.19291e-22	21.3775
RDH10	-1.35091	2.87853e-16	15.5408
SGPP1	-1.35459	5.72465e-28	27.2423
ALDH1L2	-1.37641	0.0405881	1.3916
MTHFD1L	-1.38211	7.10727e-48	47.1483
HSD17B6	-1.38483	0.00591714	2.22789
BMP1	-1.38684	1.22664e-14	13.9113
TST	-1.41113	1.51232e-40	39.8204
ACOX1	-1.41743	2.31146e-54	53.6361
SAT1	-1.41896	1.56425e-41	40.8057
ADPRM	-1.42437	3.15974e-05	4.50035
SLC36A4	-1.44071	0.000173091	3.76172
SLC16A1	-1.47052	6.61921e-31	30.1792
TRDMT1	-1.47792	4.0093e-06	5.39693
CPOX	-1.49165	1.67162e-32	31.7769
ST3GAL5	-1.50439	2.2189e-22	21.6539
SMOX	-1.52053	2.70853e-13	12.5673
GALNT7	-1.54302	6.25288e-43	42.2039
GALNT12	-1.55169	9.06399e-06	5.04268
CTSD	-1.56403	9.87324e-53	52.0055
GFPT2	-1.58054	2.29206e-12	11.6398
TIGAR	-1.58546	0.00264717	2.57722
FNTA	-1.59593	6.69216e-31	30.1744
GALNT18	-1.60715	2.59952e-15	14.5851
PDIA5	-1.60807	9.65526e-65	64.0152
CYP2U1	-1.61024	3.00755e-09	8.52179
PYGL	-1.62604	2.66495e-80	79.5743
ALOXE3	-1.62952	7.51607e-06	5.12401
BDH2	-1.62964	4.21286e-07	6.37542
QDPR	-1.63183	3.11823e-16	15.5061
XYLT1	-1.63789	8.04627e-07	6.09441
B4GALT4	-1.66738	3.90678e-63	62.4082
ACOT11	-1.67174	7.71404e-06	5.11272
UBE2L6	-1.7101	3.56018e-20	19.4485
PXDN	-1.71848	5.91569e-93	92.228
CYP26B1	-1.73227	5.16032e-06	5.28732
SLC28A1	-1.7516	0.00794008	2.10018
PDE9A	-1.76989	4.77275e-33	32.3212
CERS1	-1.80139	2.70538e-06	5.56777
AQP3	-1.81435	1.40346e-97	96.8528
PLOD2	-1.83688	2.88106e-97	96.5404
P4HA2	-1.85634	1.99564e-50	49.6999
GPT2	-1.89612	3.79454e-59	58.4208
AKR1B15	-1.89922	4.06885e-05	4.39053
HAS3	-1.96083	5.76682e-06	5.23906
ME2	-1.96418	4.38646e-38	37.3579
HNMT	-2.00301	4.90267e-15	14.3096
ABCC4	-2.00691	2.66167e-28	27.5748
GCSH	-2.01273	9.9873e-08	7.00055
SGMS2	-2.01979	2.05618e-16	15.6869
SLC44A3	-2.0636	0.000103583	3.98471
PIK3R5	-2.07396	0.00573033	2.24182
SLC43A1	-2.09274	1.22482e-09	8.91193
ADCY7	-2.10629	3.00931e-09	8.52153
CYP1B1	-2.15197	1.4802e-149	148.83
PDK1	-2.21157	9.4206e-45	44.0259
ABCA4	-2.21463	1.69416e-10	9.77105
FOSL1	-2.21542	1.43262e-08	7.84387
KCNJ8	-2.23487	0.0188188	1.72541
AK4	-2.24625	1.83514e-86	85.7363
ARG2	-2.26773	9.09516e-09	8.04119
SLC29A4	-2.28952	9.91384e-46	45.0038
PRKD1	-2.29277	2.1673e-09	8.66408
HS3ST1	-2.30233	0.0132008	1.8794
HS3ST5	-2.34623	0.00486587	2.31284
PHGDH	-2.36222	1.50999e-141	140.821
GSTM2	-2.39088	1.82873e-05	4.73785
DNM3	-2.3925	3.92028e-10	9.40668
GSTM4	-2.3954	3.578e-95	94.4464
CYP2A6	-2.42863	0.021919	1.65918
SLC25A18	-2.45006	4.3567e-06	5.36084
ADA	-2.49666	4.14412e-43	42.3826
FKBP7	-2.50761	0.000380362	3.4198
ALOX5	-2.55106	0.00452248	2.34462
MAOA	-2.56229	9.88846e-19	18.0049
STAMBPL1	-2.57104	0.000702807	3.15316
DHRS3	-2.60061	4.32895e-84	83.3636
AKR1B10	-2.61889	1.61392e-08	7.79212
SLC6A3	-2.62737	0.03811	1.41896
SMPD3	-2.64861	5.48796e-17	16.2606
GPAT2	-2.71246	0.0148384	1.82861
PGM1	-2.77876	2.03379e-18	17.6917
CHST11	-2.79448	3.23637e-50	49.4899
ACP7	-2.813	0.00198557	2.70211
TGM2	-2.81685	5.88367e-11	10.2304
FABP6	-2.89965	3.16696e-06	5.49936
SDR16C5	-2.96929	0.00363705	2.43925
ASPH	-2.97063	3.99492e-222	221.398
PFKFB3	-2.99135	2.09029e-282	281.68
ANGPTL4	-3.09583	3.01969e-27	26.52
NPAS2	-3.12563	5.72405e-72	71.2423
CYP24A1	-3.13439	6.50114e-41	40.187
DIO3	-3.16715	1.26062e-08	7.89941
SLC14A1	-3.19713	1.17387e-08	7.93038
EGFR	-3.37058	1.10905e-67	66.955
ABCC3	-3.55622	1.27318e-197	196.895
DHRS2	-3.57246	0	#NUM!
SLC1A1	-3.60979	2.19354e-09	8.65886
CSGALNACT1	-3.66212	1.54562e-30	29.8109
GALNT14	-3.67787	3.55842e-64	63.4487
AGPAT4	-3.77824	0.0110754	1.95564
RNF128	-3.87069	0.0420807	1.37592
LOXL2	-3.96094	3.93878e-153	152.405
CP	-4.02585	6.59856e-20	19.1806
HPGD	-4.18832	6.64744e-07	6.17735
UGT1A7	-4.23513	0.0143999	1.84164
ALDH1A3	-4.24905	1.94905e-118	117.71
PNPLA3	-4.33548	6.55129e-09	8.18367
HAS1	-4.58405	0.00611486	2.21361
UGT1A6	-4.76381	1.11919e-15	14.9511
ALDH3A1	-4.84042	0.00960423	2.01754
UGT1A1	-5.13433	2.74671e-07	6.56119
FABP5	-5.4075	5.72294e-84	83.2424
PLA2G2F	-5.54513	0.000635849	3.19665
GUCY1B1	-5.72287	0.000301398	3.52086
CA9	-6.48856	1.65755e-06	5.78053
MID1	-6.6607	1.33853e-29	28.8734
DIO2	-6.91834	9.94571e-248	247.002
