# Supplementary material
Source: Research Square preprint supplement (doi:10.21203/rs.3.rs-9781236/v1)
Supplement: Supplementary file 4 [file 61f7c247fa3e743e9ca2877e.xlsx]

## Sheet: RSL3
	Combination	Most synergic score_lowDose
	RSL3vsFul_L370F	7.33235
	RSL3vsEla_L370F	9.22071
	RSL3vsImlu_L370F	16.271
	RSL2vsCami_L370F	9.84161
	RSL3vsGire_L370F	16.5047
	RSL3vsGDC0927_L370F	11.229
	RSL3vsPala_L370F	18.0839
	RSL3vsTam_L370F	17.1808
	RSL3vsRal_L370F	12.3662
	RSL3vsBaso_L370F	12.8701
	RSL3vsLaso_L370F	20.5267
	RSL3vsH3B_L370F	25.2211
	RSL3vsPalbo_L370F	14.732
	RSL3vsAbe_L370F	35.3066
	RSL3vsRibo_L370F	12.8523
	RSL3vsRal_Y537S	32.9151
	RSL3vsTam_Y537S	28.5619
	RSL3vsPalbo_Y537S	27.6306
	RSL3vsGDC0927_Y537S	26.1454
	RSL3vsLaso_Y537S	25.7933
	RSL3vsH3B_Y537S	25.3254
	RSL3vsEla_Y537S	25.3123
	RSL3vsPala_Y537S	23.9138
	RSL3vsBaso_Y537S	23.6563
	RSL3vsCami_Y537S	23.5626
	RSL3vsRibo_Y537S	23.4469
	RSL3vsFul_Y537S	21.8256
	RSL3vsAbe_Y537S	21.7192
	RSL3vsImlu_Y537S	20.6584
	RSL3vsGire_Y537S	15.8092
