# Supplementary material
Source: Research Square preprint supplement (doi:10.21203/rs.3.rs-9781236/v1)
Supplement: Supplementary file 6 [file b0e447d6963bed05c5039db1.xlsx]

## Sheet: Foglio1
		Distances between multivariate centroids were quantified using two-sample Hotelling’s T² test.		All drugs	Cell lines	T²	F (2,23)	p value
				Proliferation	L370F vs Y537S	35.20	16.87	3.1 × 10-5
				Proliferation	L370F vs MCF-7	4.36	2.09	0.147
				Proliferation	Y537S vs MCF-7	50.79	24.34	2.1 × 10-6
				ERE activity	L370F vs Y537S	37.92	18.17	1.85 × 10-5
				ERE activity	L370F vs MCF-7	16.95	8.12	0.0021
				ERE activity	Y537S vs MCF-7	24.12	11.56	3.35 × 10-4
				ER levels	L370F vs Y537S	1.18	0.57	0.576
				ER levels	L370F vs MCF-7	11.07	5.30	0.0128
				ER levels	Y537S vs MCF-7	2.52	1.21	0.318
				SERD-only	Cell lines	T²	F (2,11)	p value
				Proliferation	L370F vs Y537S	17.96	8.23	0.0065
				Proliferation	L370F vs MCF-7	3.92	1.80	0.21
				Proliferation	Y537S vs MCF-7	37.23	17.07	0.00042
				ERE activity	L370F vs Y537S	30.22	13.85	0.00099
				ERE activity	L370F vs MCF-7	19.97	9.15	0.0046
				ERE activity	Y537S vs MCF-7	21.63	9.92	0.0035
				ER levels	L370F vs Y537S	11.29	5.18	0.026
				ER levels	L370F vs MCF-7	12.39	5.68	0.020
				ER levels	Y537S vs MCF-7	6.69	7.65	0.0083
