# Supplementary material
Source: Research Square preprint supplement (doi:10.21203/rs.3.rs-9781236/v1)
Supplement: Supplementary file 8 [file cb952287390bc8262b0f4065.xlsx]

## Sheet: Combined Score for L370F cells
	Drug	z_Proliferation	z_ERE activity	z_ER levels	Z_comb	Score	p_two_sided	q_BH	Rank
	Palasestrant	-21.4704	1.82636	-1.10263	-21.0535	21.0535	0	0	1
	Giredestrant	-10.1724	1.18129	-0.782484	-9.96798	9.96798	0	0	2
	Fulvestrant	-5.56943	-10.3992	-1.31631	-6.92647	6.92647	4.31477e-12	1.12184e-11	3
	GDC0927	-6.1883	1.48181	2.08641	-5.6546	5.6546	1.56211e-08	2.90106e-08	4
	Imlunestrant	-4.21669	1.87152	-1.30442	-4.0825	4.0825	4.45539e-05	7.24001e-05	5
	H3B	-0.330979	-1.12079	-2.37878	-0.756694	0.756694	0.449233	0.584003	6
	AZD9496	-0.596764	1.14759	-0.886717	-0.555542	0.555542	0.578524	0.650872	7
	Camizestrant	0.00118381	1.0712	-0.538684	0.0667134	-0.0667134	0.94681	0.94681	8
	Basedoxifene	1.86979	-7.55527	-3.15217	0.523244	-0.523244	0.600805	0.650872	9
	Elacestrant	1.70446	1.09874	0.92336	1.92734	-1.92734	0.0539373	0.0779095	10
	Lasofoxifen	6.34616	1.66872	-0.372311	6.40884	-6.40884	1.46632e-10	3.17702e-10	11
	Raloxifen	8.23748	-2.08507	-1.59122	7.65919	-7.65919	1.86517e-14	6.06182e-14	12
	Tamoxifen	17.5258	-2.76219	2.73048	17.2544	-17.2544	0	0	13

## Sheet: Combined Score for Y537S cells
	Drug	z_Proliferation	z_ERE activity	z_ER levels	Z_comb	Score	p_two_sided	q_BH	Rank
	Palasestrant	-31.2122	0.370112	-2.04005	-30.9412	30.9412	0	0	1
	Giredestrant	-15.6066	-4.48713	0.201342	-15.8959	15.8959	0	0	2
	Fulvestrant	-15.4523	-2.26699	2.8626	-15.143	15.143	0	0	3
	GDC0927	-13.1194	-8.49354	-2.65687	-14.2916	14.2916	0	0	4
	Imlunestrant	-13.6459	-2.09235	-2.85211	-14.0462	14.0462	0	0	5
	H3B	-10.252	-2.80994	2.80376	-10.0963	10.0963	0	0	6
	AZD9496	-7.08455	0.983426	-5.28204	-7.50551	7.50551	6.12843e-14	1.13814e-13	7
	Camizestrant	-6.75954	-3.91307	-2.39746	-7.43311	7.43311	1.06137e-13	1.72473e-13	8
	Basedoxifene	-5.51376	-4.60611	-5.66365	-6.6937	6.6937	2.17595e-11	3.14304e-11	9
	Elacestrant	-3.78411	-2.16679	-0.570132	-4.06323	4.06323	4.83983e-05	6.29178e-05	10
	Lasofoxifen	-4.15286	0.0618521	1.87891	-3.85056	3.85056	0.000117849	0.000130057	11
	Raloxifen	-2.30055	-0.128374	-12.7124	-3.84602	3.84602	0.000120052	0.000130057	12
	Tamoxifen	0.84051	1.85218	2.28466	1.33689	-1.33689	0.18126	0.18126	13
