# Supplementary material
Source: Research Square preprint supplement (doi:10.21203/rs.3.rs-9781236/v1)
Supplement: Supplementary file 9 [file d11766b1ece7a985d3e3c952.xlsx]

## Sheet: Weights_per_pathway
	Line	Pathway	Glycolytic_weight	Oxidative_weight	Pathway_assignment	Rationale
	L370F	Amino sugar and nucleotide sugar metabolism	2.5	0	Glycolytic	Amino-/nucleotide-sugars connected to glycolY537Sis
	L370F	Choline metabolism in cancer	0	1	Oxidative	Membrane lipid remodeling in cancer
	L370F	Fat digestion and absorption	0	2	Oxidative	Lipid absorption and catabolism
	L370F	Linoleic acid metabolism	0	2	Oxidative	Polyunsaturated fatty-acid metabolism
	L370F	Peroxisome	0	2	Oxidative	β-oxidation/peroxisomes → oxidative
	L370F	Primary bile acid biosynthesis	0	1	Oxidative	Bile acids – lipid metabolism
	L370F	Sphingolipid metabolism	0	1	Oxidative	Membrane lipid metabolism
	L370F	Ether lipid metabolism	0	0	Neutral	No match to main categories
	L370F	Fc gamma R-mediated phagocytosis	0	0	Neutral	No match to main categories
	L370F	Folate biosynthesis	0	0	Neutral	No match to main categories
	L370F	Glucagon signaling pathway	0	0	Neutral	No match to main categories
	L370F	Inositol phosphate metabolism	0	0	Neutral	No match to main categories
	L370F	Insulin signaling pathway	0	0	Neutral	No match to main categories
	L370F	LY537Sosome	0	0	Neutral	No match to main categories
	L370F	Morphine addiction	0	0	Neutral	No match to main categories
	L370F	Pancreatic secretion	0	0	Neutral	No match to main categories
	L370F	Prolactin signaling pathway	0	0	Neutral	No match to main categories
	L370F	Purine metabolism	0	0	Neutral	No match to main categories
	L370F	Renin secretion	0	0	Neutral	No match to main categories
	L370F	Vascular smooth muscle contraction	0	0	Neutral	No match to main categories
	Y537S	Fructose and mannose metabolism	2.5	0	Glycolytic	Sugar metabolism feeding into glycolY537Sis
	Y537S	Glycolysis / Gluconeogenesis	4	0	Glycolytic	Core glycolytic pathway
	Y537S	HIF-1 signaling pathway	4	0	Glycolytic	Hypoxia/glycolytic driver (HIF‑1) – promotes glycolY537Sis
	Y537S	Pentose and glucuronate interconversions	2.5	0	Glycolytic	Sugar pathwaY537S linked to NADPH/anabolism
	Y537S	Bile secretion	0	1	Oxidative	Bile acids – lipid metabolism
	Y537S	Ferroptosis	0	1	Oxidative	Redox/detoxification/oxidative stress
	Y537S	Glycerolipid metabolism	0	1	Oxidative	Membrane lipid metabolism
	Y537S	Glycosphingolipid biosynthesis	0	1	Oxidative	Membrane lipid metabolism
	Y537S	Porphyrin metabolism	0	1	Oxidative	Redox/detoxification/oxidative stress
	Y537S	Retinol metabolism	0	1	Oxidative	Redox/detoxification/oxidative stress
	Y537S	Sphingolipid signaling pathway	0	1	Oxidative	Membrane lipid metabolism
	Y537S	Steroid biosynthesis	0	1	Oxidative	Steroid/cholesterol biosynthesis
	Y537S	Steroid hormone biosynthesis	0	1	Oxidative	Steroid/cholesterol biosynthesis
	Y537S	Arginine and proline metabolism	0	0	Neutral	No match to main categories
	Y537S	Ascorbate and aldarate metabolism	0	0	Neutral	No match to main categories
	Y537S	Chemical carcinogenesis	0	0	Neutral	No match to main categories
	Y537S	Drug metabolism	0	0	Neutral	No match to main categories
	Y537S	Metabolism of xenobiotics by cytochrome P450	0	0	Neutral	No match to main categories
	Y537S	Phospholipase D signaling pathway	0	0	Neutral	No match to main categories

## Sheet: Score_summary
	Line	N_pathways	Sum_glycolytic_weights	Sum_oxidative_weights	Classification (weighted score)
	L370F	20	2.5	9	Oxidative
	Y537S	19	13	9	Glycolytic

## Sheet: Weight_schema
	Category	Pattern_regex	Weight	Rationale
	Glycolytic	HIF\-1	4	Hypoxia/glycolytic driver (HIF‑1) – promotes glycolysis
	Glycolytic	Glycolysis|Gluconeogenesis	4	Core glycolytic pathway
	Glycolytic	Fructose|Mannose	2.5	Sugar metabolism feeding into glycolysis
	Glycolytic	Pentose|glucuronate	2.5	Sugar pathways linked to NADPH/anabolism
	Glycolytic	Amino_sugar	2.5	Amino-/nucleotide-sugars connected to glycolysis
	Glycolytic	Central_carbon_metabolism_in_cancer	2	Cancer metabolic reprogramming (often Warburg)
	Oxidative	Peroxisome	2	β-oxidation/peroxisomes → oxidative
	Oxidative	PPAR	2	PPAR regulates fatty-acid oxidation
	Oxidative	alpha\-Linolenic|Linolenic|Linoleic|Arachidonic	2	Polyunsaturated fatty-acid metabolism
	Oxidative	Fat_digestion	2	Lipid absorption and catabolism
	Oxidative	Glycerolipid|Glycerophospholipid|Sphingolipid	1	Membrane lipid metabolism
	Oxidative	Sphingolipid_signaling_pathway	1	Lipid signaling
	Oxidative	Steroid_biosynthesis|Steroid_hormone_biosynthesis	1	Steroid/cholesterol biosynthesis
	Oxidative	Primary_bile_acid_biosynthesis|Bile_secretion	1	Bile acids – lipid metabolism
	Oxidative	Retinol_metabolism|Porphyrin_metabolism|Ferroptosis	1	Redox/detoxification/oxidative stress
	Oxidative	Choline_metabolism_in_cancer	1	Membrane lipid remodeling in cancer

## Sheet: Notes_and_rationale
Notes
Weighted criterion used to assign each pathway as Glycolytic or Oxidative. Rationale: cancer cells frequently display aerobic glycolysis (Warburg effect), with up‑regulation of HIF‑1, glycolysis, and sugar pathways; at the same time, many lines retain or increase lipid/oxidative metabolism (peroxisomes, fatty acids, sterols), reflecting metabolic plasticity. For each pathway a weight is assigned …
