# Supplementary material
Source: Research Square preprint supplement (doi:10.21203/rs.3.rs-9781236/v1)
Supplement: Supplementary file 10 [file da6e21857e6b63380374a61a.xlsx]

## Sheet: Foglio1
	Recombinant ER	Drug	Binding affinity (Mean value)	Binding affinity (Standard Deviation)	Replicates
	WT	Fulvestrant	5.7	2.1	5				Two-sample t-test (Welch)	Mean A	Mean B	t-stat	p-value
		Elacestrant	3.9	1.9	10				L370F vs Y537S	17.07	27.01	-1.44	0.166
		Camizestrant	9.4	3.4	15				L370F vs MCF-7	17.07	7.68	2.09	0.048
		Giredestrant	4.2	1.5	15				Y537S vs MCF-7	27.01	7.68	3.07	0.0078
		GDC0927	3.4	1.4	10
		Imlunestrant	11.7	6.7	15
		AZD9496	3.7	2.8	5
		Basedoxifene	2.3	1.2	5
		Palasestrant	33.3	12.3	5
		H3B	5	1.9	5
		Tamoxifen	7.5	3.2	5
		Lasofoxifen	3.5	1.6	5
		Raloxifen	2	0.6	5
	LF	Fulvestrant	19.9	6.7	5
		Elacestrant	8.5	4.5	10
		Camizestrant	37.8	18.9	15
		Giredestrant	6.2	2.6	15
		GDC0927	2.9	1.2	10
		Imlunestrant	25.2	15	15
		AZD9496	3	2	5
		Basedoxifene	12.6	6.7	5
		Palasestrant	38.4	14.8	5
		H3B	17.7	12.2	5
		Tamoxifen	28.3	9.6	5
		Lasofoxifen	3.4	1.4	5
		Raloxifen	3.8	1.7	5
	YS	Fulvestrant	30.3	9.8	5
		Elacestrant	16.2	12.4	10
		Camizestrant	58	27.8	15
		Giredestrant	9.7	4.7	15
		GDC0927	2.6	1.1	10
		Imlunestrant	35.5	17.1	15
		AZD9496	14.3	8	5
		Basedoxifene	10.8	5.1	5
		Palasestrant	63.6	21.1	5
		H3B	45.3	20.4	5
		Tamoxifen	27.1	13	5
		Lasofoxifen	10.4	4.6	5
		Raloxifen	2.9	1.3	5
