# Supplementary material
Source: Research Square preprint supplement (doi:10.21203/rs.3.rs-9781236/v1)
Supplement: Supplementary file 11 [file e01cf07a4c2527697844da70.xlsx]

## Sheet: Specific for cell lines
	Pathways Specifically Enriched in L370F cells	Pathways Specifically Enriched in Y537S cells
	KEGG_Linoleic_acid_metabolism hsa00591	KEGG_Porphyrin_metabolism hsa00860
	KEGG_Fat_digestion_and_absorption hsa04975	KEGG_Retinol_metabolism hsa00830
	KEGG_Amino_sugar_and_nucleotide_sugar_metabolism hsa00520	KEGG_Metabolism_of_xenobiotics_by_cytochrome_P450 hsa00980
	KEGG_Ether_lipid_metabolism hsa00565	KEGG_HIF-1_signaling_pathway hsa04066
	KEGG_Sphingolipid_metabolism hsa00600	KEGG_Chemical_carcinogenesis hsa05204
	KEGG_Pancreatic_secretion hsa04972	KEGG_Drug_metabolism hsa00982
	KEGG_Glucagon_signaling_pathway hsa04922	KEGG_Ferroptosis hsa04216
	KEGG_Primary_bile_acid_biosynthesis hsa00120	KEGG_Steroid_hormone_biosynthesis hsa00140
	KEGG_Lysosome hsa04142	KEGG_Glycerolipid_metabolism hsa00561
	KEGG_Vascular_smooth_muscle_contraction hsa04270	KEGG_Ascorbate_and_aldarate_metabolism hsa00053
	KEGG_Folate_biosynthesis hsa00790	KEGG_Fructose_and_mannose_metabolism hsa00051
	KEGG_Renin_secretion hsa04924	KEGG_Pentose_and_glucuronate_interconversions hsa00040
	KEGG_Prolactin_signaling_pathway hsa04917	KEGG_Arginine_and_proline_metabolism hsa00330
	KEGG_Inositol_phosphate_metabolism hsa00562	KEGG_Phospholipase_D_signaling_pathway hsa04072
	KEGG_Peroxisome hsa04146	KEGG_Glycolysis_/_Gluconeogenesis hsa00010
	KEGG_Morphine_addiction hsa05032	KEGG_Glycosphingolipid_biosynthesis hsa00604
	KEGG_Fc_gamma_R-mediated_phagocytosis hsa04666	KEGG_Bile_secretion hsa04976
	KEGG_Choline_metabolism_in_cancer hsa05231	KEGG_Steroid_biosynthesis hsa00100
	KEGG_Purine_metabolism hsa00230	KEGG_Sphingolipid_signaling_pathway hsa04071
	KEGG_Insulin_signaling_pathway hsa04910
