# Supplementary material
Source: Research Square preprint supplement (doi:10.21203/rs.3.rs-9781236/v1)
Supplement: Supplementary file 13 [file eeffd64c1f8cde6678581f32.xlsx]

## Sheet: Enriched in L370F and Y537S
	Pathways Enriched in L370F	pval	padj				Pathways Enriched in Y537S	pval	padj
	KEGG_alpha-Linolenic_acid_metabolism hsa00592	4.13373e-09	1.17811e-06				KEGG_Porphyrin_metabolism hsa00860	7.41936e-11	2.11452e-08
	KEGG_PPAR_signaling_pathway hsa03320	3.09873e-07	4.41569e-05				KEGG_Retinol_metabolism hsa00830	1.29069e-09	1.83923e-07
	KEGG_Glycerophospholipid_metabolism hsa00564	9.60081e-07	9.12077e-05				KEGG_Metabolism_of_xenobiotics_by_cytochrome_P450 hsa00980	2.55211e-09	2.4245e-07
	KEGG_Linoleic_acid_metabolism hsa00591	1.59331e-06	0.000113523				KEGG_HIF-1_signaling_pathway hsa04066	2.26763e-08	1.61569e-06
	KEGG_Fat_digestion_and_absorption hsa04975	4.81004e-06	0.000273745				KEGG_Arachidonic_acid_metabolism hsa00590	4.37199e-08	2.49204e-06
	KEGG_Amino_sugar_and_nucleotide_sugar_metabolism hsa00520	6.72356e-06	0.000273745				KEGG_Chemical_carcinogenesis hsa05204	8.89677e-08	3.89606e-06
	KEGG_Ether_lipid_metabolism hsa00565	6.72356e-06	0.000273745				KEGG_Drug_metabolism hsa00982	9.56927e-08	3.89606e-06
	KEGG_Sphingolipid_metabolism hsa00600	8.57296e-06	0.000305412				KEGG_Drug_metabolism hsa00983	1.87733e-07	6.68798e-06
	KEGG_Arachidonic_acid_metabolism hsa00590	1.32187e-05	0.000418592				KEGG_Glycerophospholipid_metabolism hsa00564	5.18637e-07	1.57273e-05
	KEGG_Pancreatic_secretion hsa04972	6.48746e-05	0.00177445				KEGG_Ferroptosis hsa04216	5.51835e-07	1.57273e-05
	KEGG_Glucagon_signaling_pathway hsa04922	7.07176e-05	0.00177445				KEGG_Steroid_hormone_biosynthesis hsa00140	2.96401e-06	7.03952e-05
	KEGG_Primary_bile_acid_biosynthesis hsa00120	7.47138e-05	0.00177445				KEGG_Glycerolipid_metabolism hsa00561	2.96401e-06	7.03952e-05
	KEGG_Lysosome hsa04142	0.000136248	0.00287123				KEGG_Ascorbate_and_aldarate_metabolism hsa00053	1.47507e-05	0.000323381
	KEGG_Vascular_smooth_muscle_contraction hsa04270	0.000142484	0.00287123				KEGG_Fructose_and_mannose_metabolism hsa00051	1.79796e-05	0.000366013
	KEGG_Glycosaminoglycan_biosynthesis hsa00534	0.000151117	0.00287123				KEGG_Pentose_and_glucuronate_interconversions hsa00040	2.36441e-05	0.000449239
	KEGG_Folate_biosynthesis hsa00790	0.000177775	0.00316662				KEGG_Mucin_type_O-glycan_biosynthesis hsa00512	2.57642e-05	0.000458926
	KEGG_Mucin_type_O-glycan_biosynthesis hsa00512	0.000342964	0.00574969				KEGG_Arginine_and_proline_metabolism hsa00330	6.96073e-05	0.00116695
	KEGG_Renin_secretion hsa04924	0.00125712	0.018432				KEGG_Phospholipase_D_signaling_pathway hsa04072	9.19709e-05	0.00145621
	KEGG_Prolactin_signaling_pathway hsa04917	0.00129348	0.018432				KEGG_Glycolysis_/_Gluconeogenesis hsa00010	0.000159582	0.00239373
	KEGG_Central_carbon_metabolism_in_cancer hsa05230	0.00129348	0.018432				KEGG_Central_carbon_metabolism_in_cancer hsa05230	0.000190033	0.00270796
	KEGG_Inositol_phosphate_metabolism hsa00562	0.00140554	0.0190752				KEGG_PPAR_signaling_pathway hsa03320	0.000224019	0.00304026
	KEGG_Drug_metabolism hsa00983	0.00168443	0.021821				KEGG_Glycosphingolipid_biosynthesis hsa00604	0.00025259	0.00327219
	KEGG_Peroxisome hsa04146	0.00176856	0.0219147				KEGG_Bile_secretion hsa04976	0.000385828	0.00478091
	KEGG_Morphine_addiction hsa05032	0.00217138	0.0257852				KEGG_Steroid_biosynthesis hsa00100	0.000454735	0.00539997
	KEGG_Fc_gamma_R-mediated_phagocytosis hsa04666	0.00246179	0.0275341				KEGG_Glycosaminoglycan_biosynthesis hsa00534	0.000657865	0.00749966
	KEGG_Choline_metabolism_in_cancer hsa05231	0.00251188	0.0275341				KEGG_alpha-Linolenic_acid_metabolism hsa00592	0.000773077	0.00847412
	KEGG_Purine_metabolism hsa00230	0.00423446	0.044697				KEGG_Sphingolipid_signaling_pathway hsa04071	0.000899178	0.00949133
	KEGG_Insulin_signaling_pathway hsa04910	0.00476431	0.0484939
