# Supplementary material
Source: Research Square preprint supplement (doi:10.21203/rs.3.rs-9781236/v1)
Supplement: Supplementary file 14 [file f5c4022ab8f9975fefc037f7.xlsx]

## Sheet: ERA
	Combination	Most synergic score_lowDose
	ERA_Ful_L370F	15.8811
	ERA_Ela_L370F	19.6825
	ERA_Imlu_L370F	13.9036
	ERA_Palbo_L370F	17.6348
	ERA_ABE_L370F	20.8678
	ERA_Ribo_L370F	16.092
	ERA_Ful_Y537S	15.9104
	ERA_Ela_Y537S	14.6432
	ERA_Imlu_Y537S	15.7855
	ERA_Palbo_Y537S	17.8555
	ERA_ABE_Y537S	26.2587
	ERA_Ribo_Y537S	27.4238
