# Supplementary material
Source: Research Square preprint supplement (doi:10.21203/rs.3.rs-9781236/v1)
Supplement: Supplementary file 15 [file fbaf2a6101eb61ba7e2aa91b.xlsx]

## Sheet: Up L370F
	Genes up-regulated in L370F cells and not modulated in Y537S vs MCF-7 cells
	PNCK
	HYAL3
	SH3RF2
	PLA2G3
	RENBP
	HS3ST3A1
	CKMT1B
	GLUD2
	NPC1L1
	PLTP
	CHST1
	ST6GALNAC4
	GALNTL6
	UGT2B15
	QPRT
	DEGS1
	GCK
	RGL1
	SLC16A3
	PLA2G4F
	PLCH2
	FUT4
	FADS2
	B3GALT6
	SLC9A4
	FAR2
	CYB5R2
	TH
	MGAT3
	PLPPR3
	GALC
	PIP5K1B
	CPT1C
	ACOX2
	ARSA
	SLC6A14
	PLA2G10
	TYMP
	PDE1A
	GPAT3
	ATP2A3
	UBE2QL1
	PAH
	PDE3B
	SLC39A6
	HSD3B7

## Sheet: Up Y537S
		Genes up-regulated in Y537S cells and not modulated in L370F vs MCF-7 cells
		CYP26B1
		ASPH
		GCSH
		DIO3
		ARG2
		SLC25A18
		PXYLP1
		HAS3
		DNM3
		HMOX1
		ME2
		P4HA2
		SLC41A1
		PLA2G2F
		ALOXE3
		PDK1
		PNPLA3
		PLCD3
		UGT1A1
		CPOX
		ALOX5
		HPS3
		SH3BP1
		CERS1
		SLC44A3
		LDHA
		TGM2
		PIK3R5
		SDR16C5
		CYP2U1
		CA9
		SLC36A4
		ALDOC
		SLC29A3
		NDUFA11
		GFPT2
		ST3GAL1
		EGFR
		AGPAT4
		ACOT11
		LPCAT3
		HS3ST1
		CSGALNACT1
		PFKFB3
		ALDH3A1
		ST3GAL5
		UGT1A7
		GALNT7
		TPST1
		USP7
		ACOT9
		ACOX1
		ACP7
		UGT1A6
		PXDN
		GUCY1B1
		HS3ST5
		HPGD
		CTSD
		TBL1XR1
		GSTM4
		PMM2
		HAS1
		SERPINA3
		SLC14A1
		GPAT2
		HPRT1
		AKR1B15
		PDXK
		PLOD2
		TPST2
		DHRS3
		CLCF1
		SOAT1
		RNF128
		SLC28A1
		CP
		B4GALT4
		SGMS2
		FOSL1
		ADA
		UBE2L6
		MBOAT2
		GALNT14
		MID1
		PEPD
		CYP1B1
		TST
		SAT1
		PARP8
		LBR
		PLIN1
		PDIA5
		ABCA4
		FABP6
		EEF1A2
